# Supplementary material
Source: MDPI journal article supplement (https://www.mdpi.com/2304-6740/10/4/50)
Supplement: s1 [file s1]

# Inorganics 2022

Exploring bacterial growth effects on *Mycobacterium Smegmatis* with the anti-carcinogenic vanadium-compounds

## Supplemental Material

### Authors

Zeyad Arhouma<sup>1,2</sup>, Heide A. Murakami<sup>2</sup>, Jordan T. Koehn<sup>2</sup>, Xiaorong Li<sup>2,3</sup>, Deborah A. Roess<sup>1,4</sup>, Dean C. Crick<sup>1,5</sup> and Debbie C. Crans,<sup>1,2\*</sup>

### Affiliations

<sup>1</sup>Cellular and Molecular Biology, Colorado State University, 80523, Fort Collins, CO, USA

<sup>2</sup>Department of Chemistry, Colorado State University, 80523, Fort Collins, CO, USA

<sup>3</sup>College of Pharmaceutical Sciences, Southwest University, 400715, Chongqing, China

<sup>4</sup>Departments of Biomedical Sciences, Colorado State University, 80523, Fort Collins, CO, USA

<sup>5</sup>Mycobacteria Research Laboratories, Department of Microbiology, Immunology and Pathology, Colorado State University, 80523, Fort Collins, CO, USA

Correspondence email: [debbie.crans@colostate.edu](mailto:debbie.crans@colostate.edu)

## Table of Contents

| <b>I. Biological Data</b>                                                                                                                                    | <b>Page</b> |
|--------------------------------------------------------------------------------------------------------------------------------------------------------------|-------------|
| <b>Figure S1.</b> The histograms of the IC <sub>50</sub> values for the effects of the V-complexes and their free ligands on the bacterial growth            | 4           |
| <b>Figure S2.</b> The growth inhibition curves and IC <sub>50</sub> values for the effects of the V-complexes and their free ligands on the bacterial growth | 5           |
| <b>Figure S3.</b> The growth of <i>M. smegmatis</i> in the presence of DMSO                                                                                  | 6           |
| <b>II. New vanadium complexes characterization</b>                                                                                                           | <b>Page</b> |
| <b>Figure S4.</b> The <sup>51</sup> V NMR spectrum of [VO(Hshed)(4NO <sub>2</sub> )]                                                                         | 7           |
| <b>Figure S5.</b> The <sup>51</sup> V NMR spectrum of [VO(Hshed)(CN)]                                                                                        | 8           |
| <b>Figure S6.</b> The <sup>51</sup> V NMR spectrum of [VO(Hshed)(3OMet)]                                                                                     | 9           |
| <b>Figure S7.</b> The <sup>51</sup> V NMR spectrum of [VO(Hshed)(Coum)]                                                                                      | 10          |
| <b>Figure S8.</b> The <sup>1</sup> H NMR spectrum of [VO(Hshed)(4NO <sub>2</sub> )]                                                                          | 11          |
| <b>Figure S9.</b> The <sup>1</sup> H NMR spectrum of [VO(Hshed)(CN)]                                                                                         | 12          |
| <b>Figure S10.</b> The <sup>1</sup> H NMR spectrum of [VO(Hshed)(3OMet)]                                                                                     | 13          |
| <b>Figure S11.</b> The <sup>1</sup> H NMR spectrum of [VO(Hshed)(Coum)]                                                                                      | 14          |
| <b>Figure S12.</b> The IR spectrum of [VO(Hshed)(4NO <sub>2</sub> )]                                                                                         | 15          |
| <b>Figure S13.</b> The IR spectrum of [VO(Hshed)(CN)]                                                                                                        | 16          |
| <b>Figure S14.</b> The IR spectrum of [VO(Hshed)(3OMet)]                                                                                                     | 17          |
| <b>Figure S15.</b> The IR spectrum of [VO(Hshed)(Coum)]                                                                                                      | 18          |
| <b>Figure S16.</b> The UV-vis spectrum of [VO(Hshed)(4NO <sub>2</sub> )]                                                                                     | 19          |

**Figure S17.** The UV-vis spectrum of [VO(Hshed)(CN)] 20

**Figure S18.** The UV-vis spectrum of [VO(Hshed)(3OMet)] 21

**Figure S19.** The UV-vis spectrum of [VO(Hshed)(Coum)] 22

### III. Speciation Data for the vanadium complexes and free ligands Page

**Figure S20.** The UV-vis spectra are recorded of all the complexes at 0.250 mM in ddH<sub>2</sub>O as a function of time (0, 1, 5, 24 h). 23

**Figure S21.** The UV-vis spectra are recorded of all the complexes at 0.250 mM in supernatant fraction as a function of time (0, 1, 5, 24 h). 24

**Figure S22.** The UV-vis spectra are recorded of all the free ligands at 0.250 mM in ddH<sub>2</sub>O and 7H9 medium at time zero (0 h). 25

**Figure S23.** The <sup>51</sup>V NMR spectra of 10mM [VO(Hshed)(3OMet)] at 0, 1, 5, and 24 h time points in **a)** 50:50 H<sub>2</sub>O:DMSO and in **b)** 50:50 7H9 growth medium: DMSO. 26

**Figure S24.** The <sup>51</sup>V NMR spectra of 10mM [VO(Hshed)(tbc)] at 0, 1, 5, and 24 h time points in **a)** 50:50 H<sub>2</sub>O:DMSO and in **b)** 50:50 7H9 growth medium: DMSO. 27

**Figure S25.** The <sup>51</sup>V NMR spectra of 10mM [VO(Hshed)(4NO<sub>2</sub>)] at 0, 1, 5, and 24 h time points in **a)** 50:50 H<sub>2</sub>O:DMSO and in **b)** 50:50 7H9 growth medium: DMSO. 28

**Figure S26.** The <sup>51</sup>V NMR spectra of 10mM [VO(Hshed)(CN)] at 0, 1, 5, and 24 h time points in **a)** 50:50 H<sub>2</sub>O:DMSO and in **b)** 50:50 7H9 growth medium: DMSO. 29

**Figure S27.** The <sup>51</sup>V NMR spectra of 10mM [VO(Hshed)(Coum)] at 0, 1, 5, and 24 h time points in **a)** 50:50 H<sub>2</sub>O:DMSO and in **b)** 50:50 7H9 growth medium: DMSO. 30

**Figure S28.** The <sup>51</sup>V NMR spectra of 10mM [VO(Hshed)(dtb)] at 0, 1, 5, and 24 h time points in supernatant fraction. 31

**Figure S29.** The <sup>51</sup>V NMR spectra of 10mM [VO(Hshed)(cat)] at 0, 1, 5, and 24 h time points in supernatant fraction. 32

**Figure S30.** The <sup>51</sup>V NMR spectra of 10mM [V(O)<sub>2</sub>(Hshed)] at 0, 1, 5, and 24 h time points in supernatant fraction. 33

**Figure S31.** The <sup>51</sup>V NMR spectra of 10mM [VO(Hshed)(3OMet)] at 0, 1, 5, and 24 h time points in supernatant fraction. 34

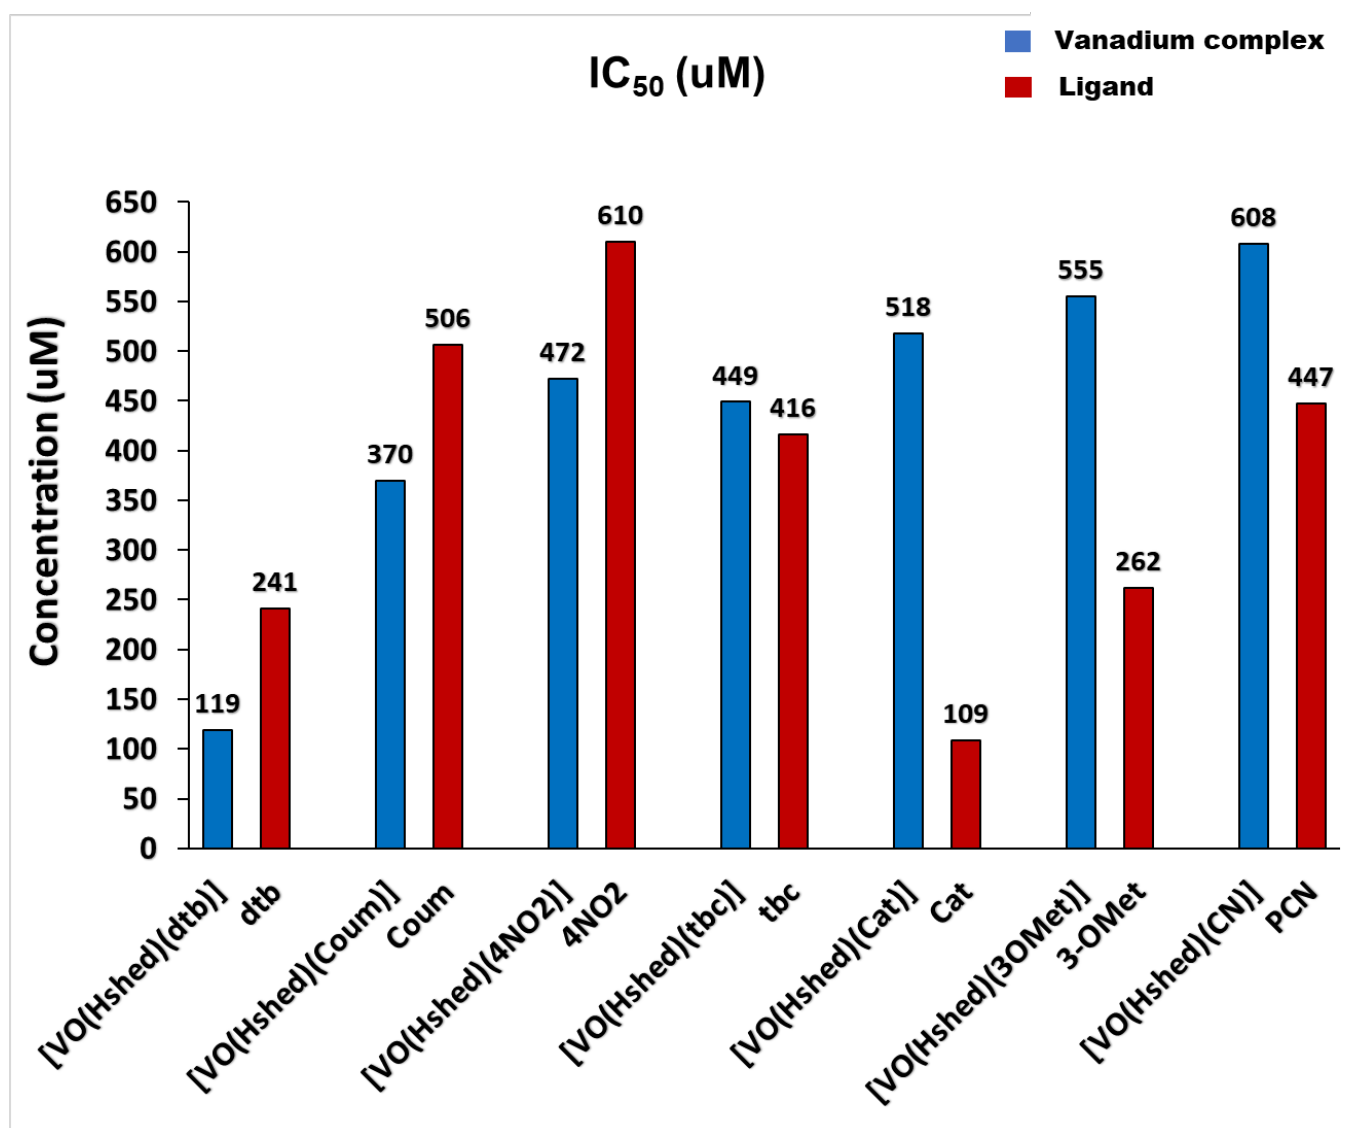

**Figure S1.** The histograms of the IC<sub>50</sub> values for the effects of the V-complexes and their free ligands on the bacterial growth.

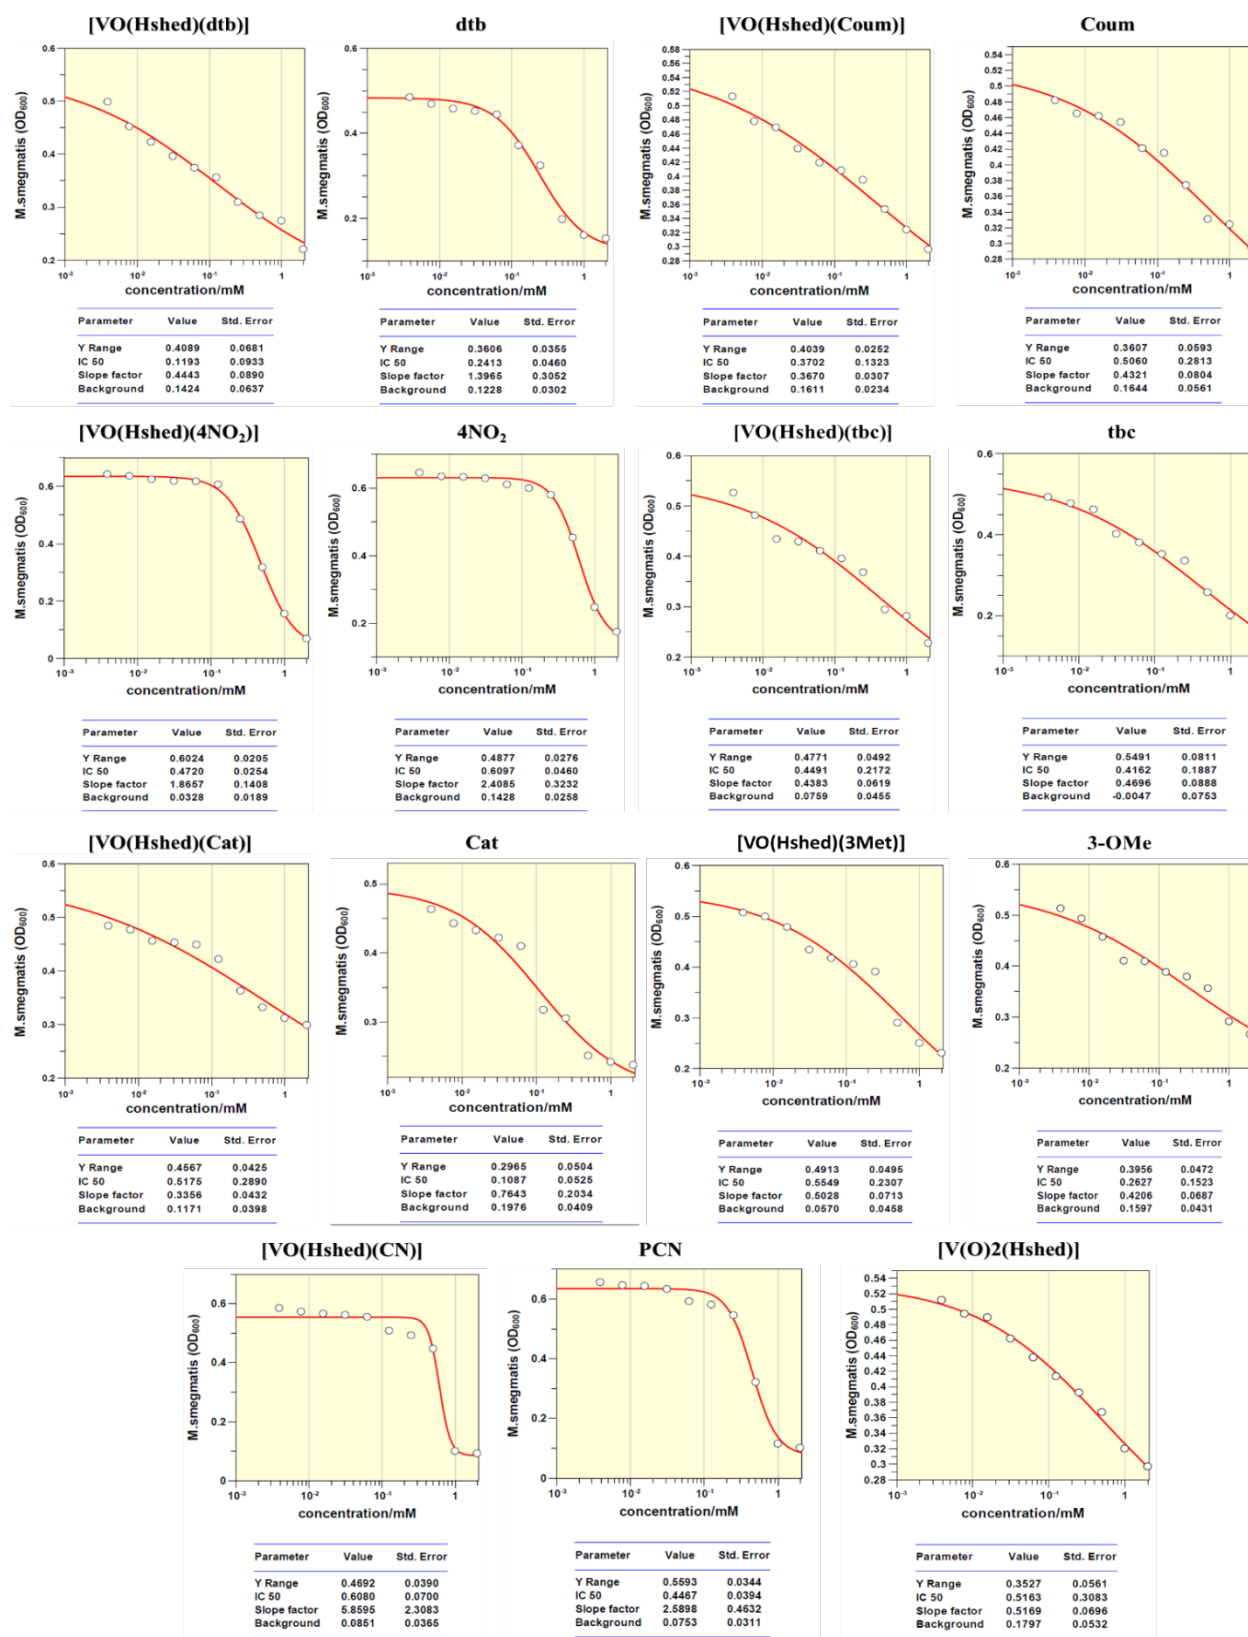

**Figure S2.** The growth inhibition curves and IC<sub>50</sub> values for the effects of the V-complexes and their free ligands on the bacterial growth.

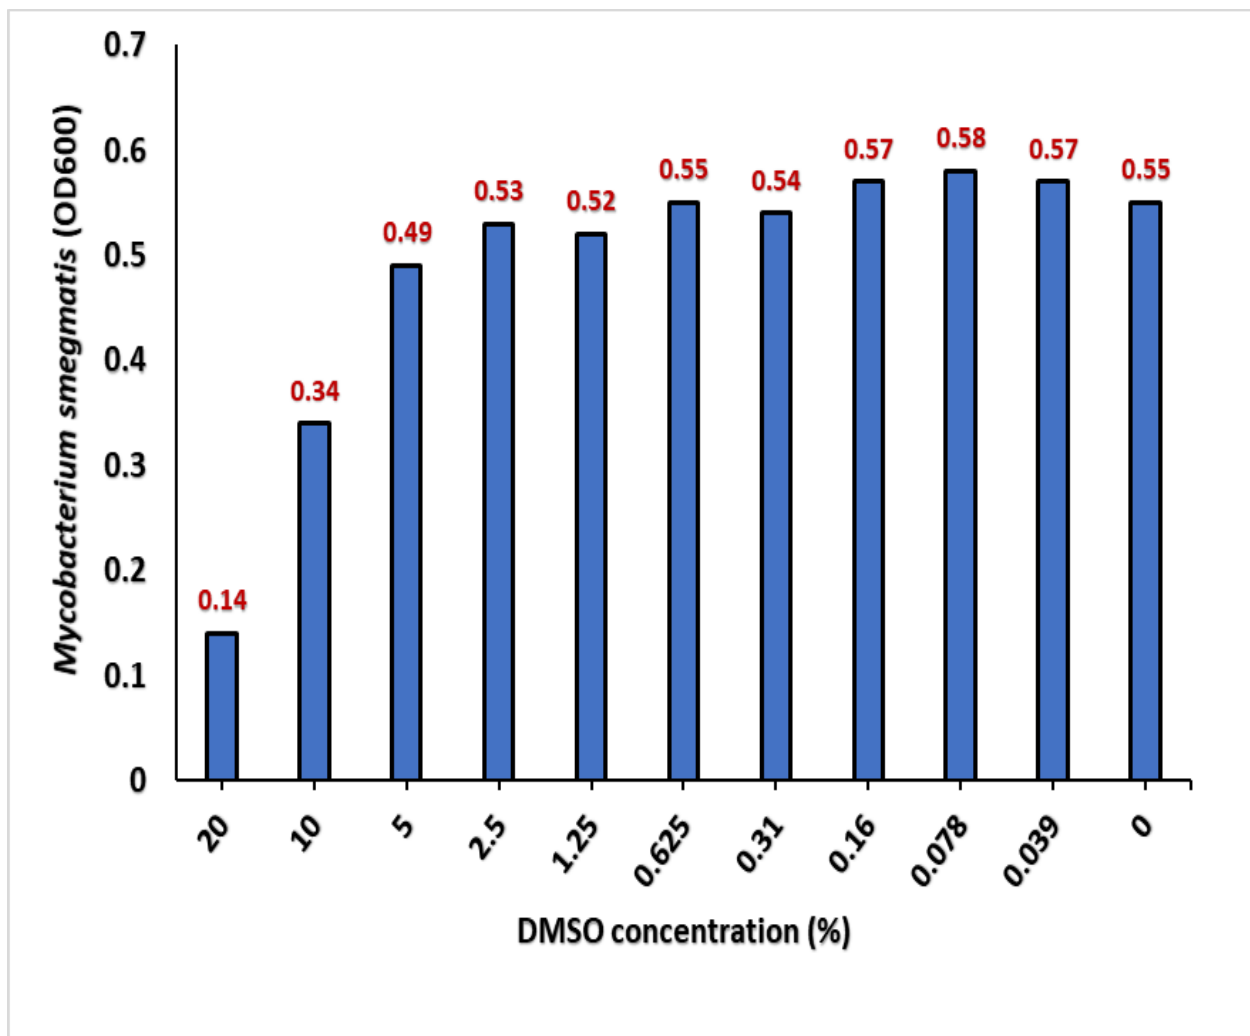

Figure S3. The growth of *M. smegmatis* in the presence of DMSO.

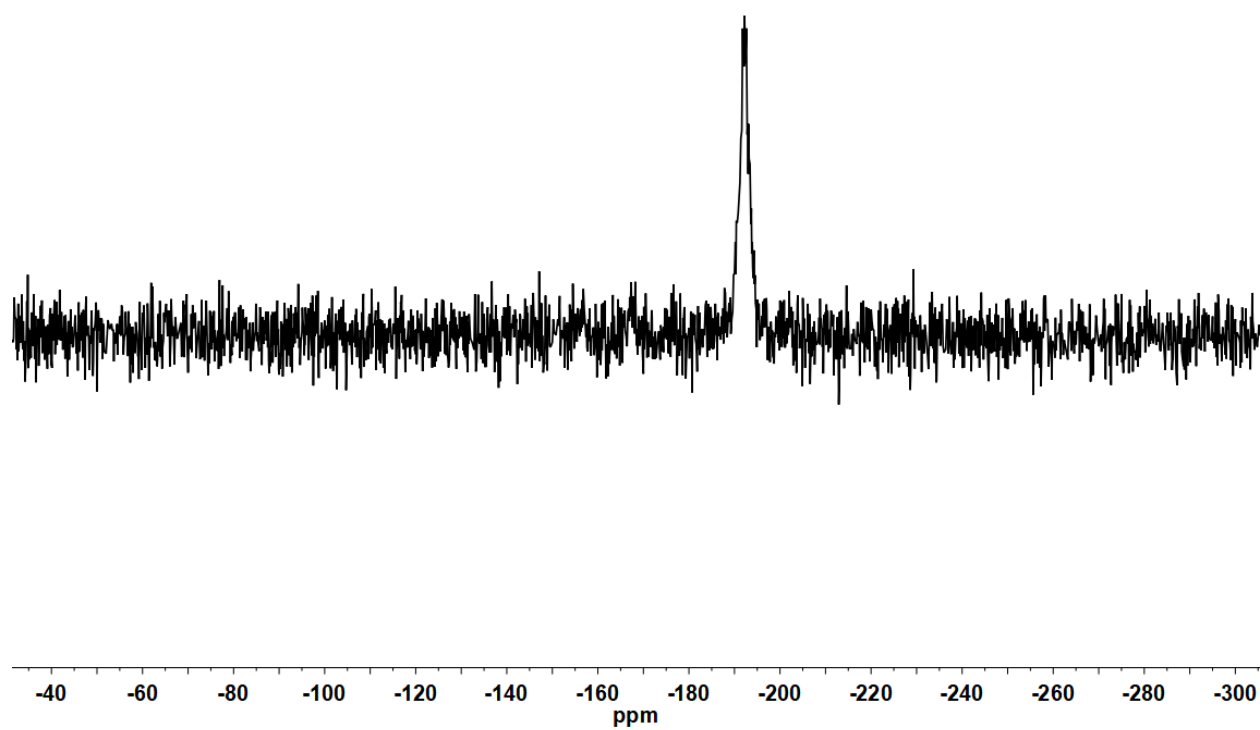

**Figure S4.** The  $^{51}\text{V}$  NMR spectrum of  $[\text{VO}(\text{Hshed})(4\text{NO}_2)]$  in  $\text{CD}_3\text{CN}$ .

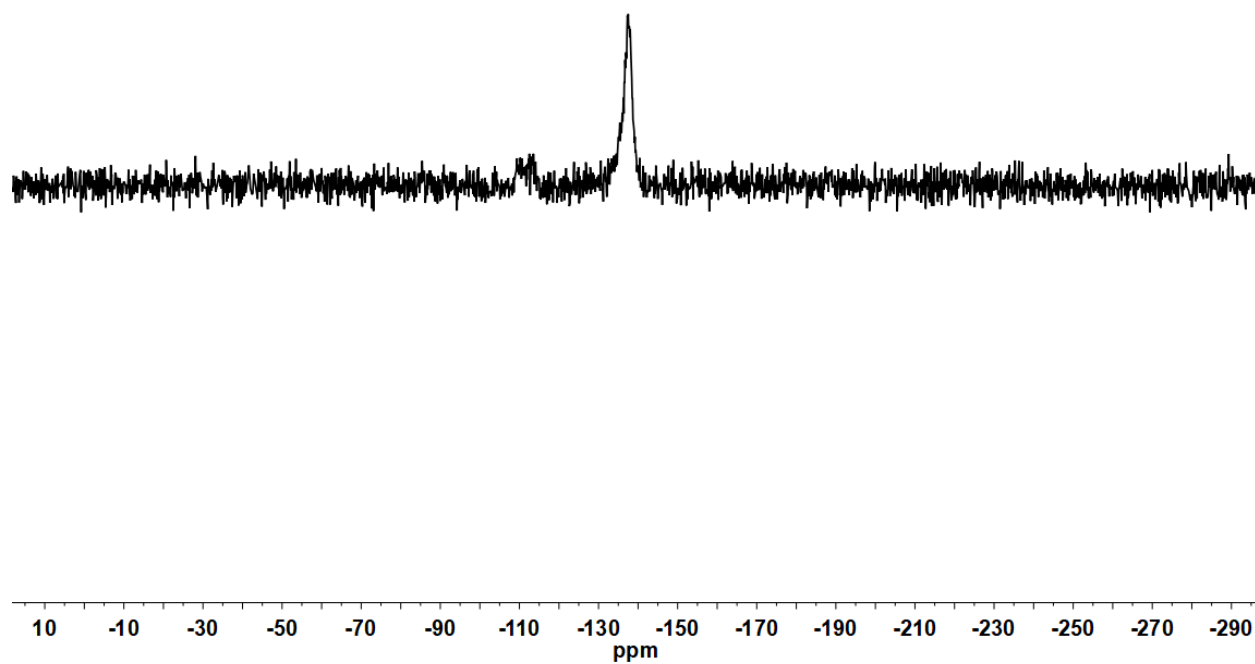

**Figure S5.** The  $^{51}\text{V}$  NMR spectrum of  $[\text{VO}(\text{Hshed})(\text{CN})]$  in  $\text{CD}_3\text{CN}$ .



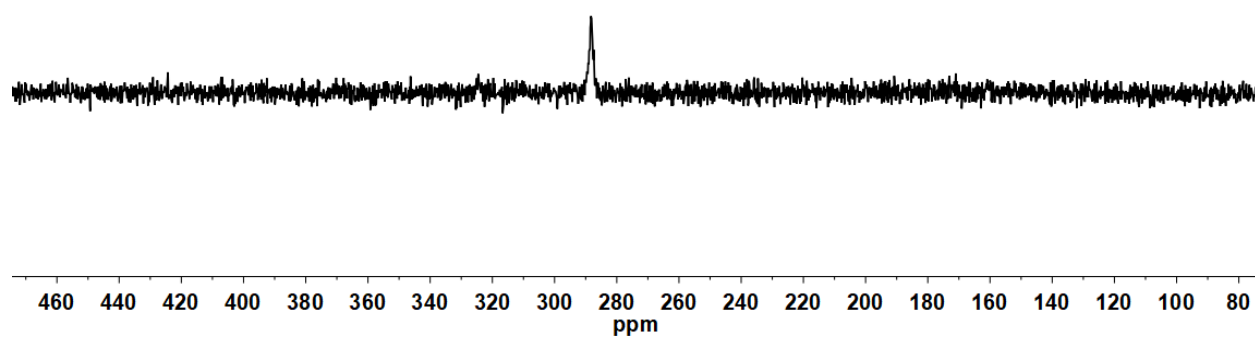

**Figure S6.** The  $^{51}\text{V}$  NMR spectrum of  $[\text{VO}(\text{Hshed})(3\text{OMet})]$  in  $\text{CD}_3\text{CN}$ .

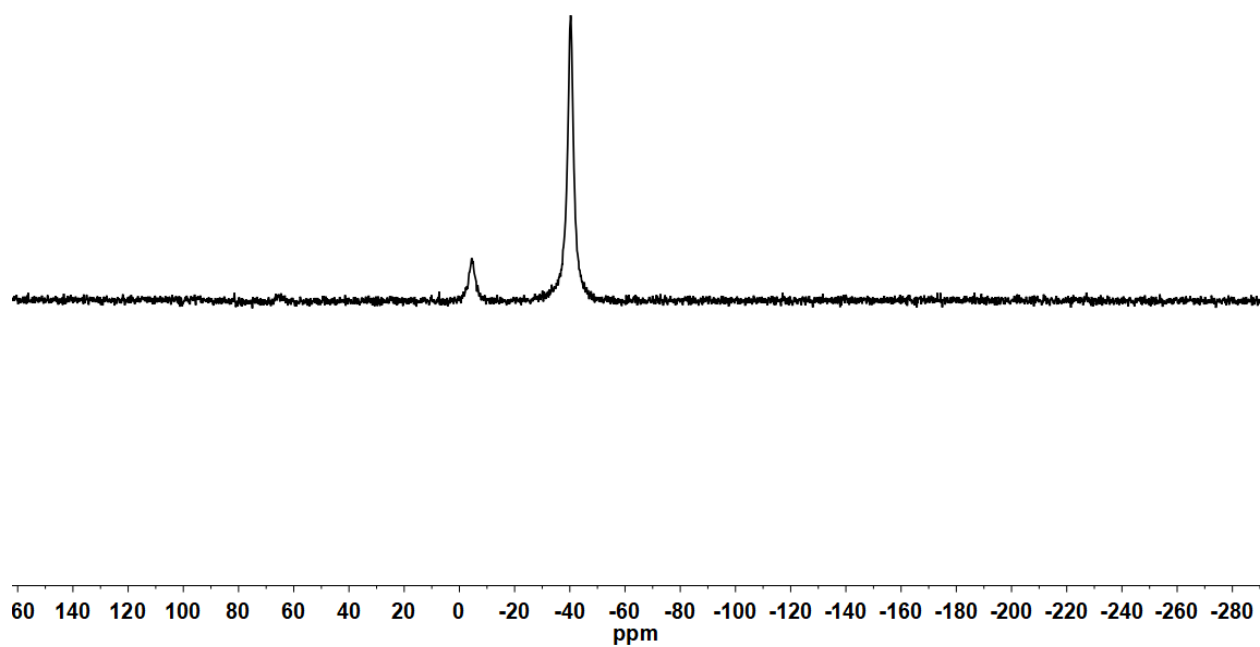

**Figure S7.** The  $^{51}\text{V}$  NMR spectrum of  $[\text{VO}(\text{Hshed})(\text{Coum})]$  in  $\text{CD}_3\text{CN}$ .

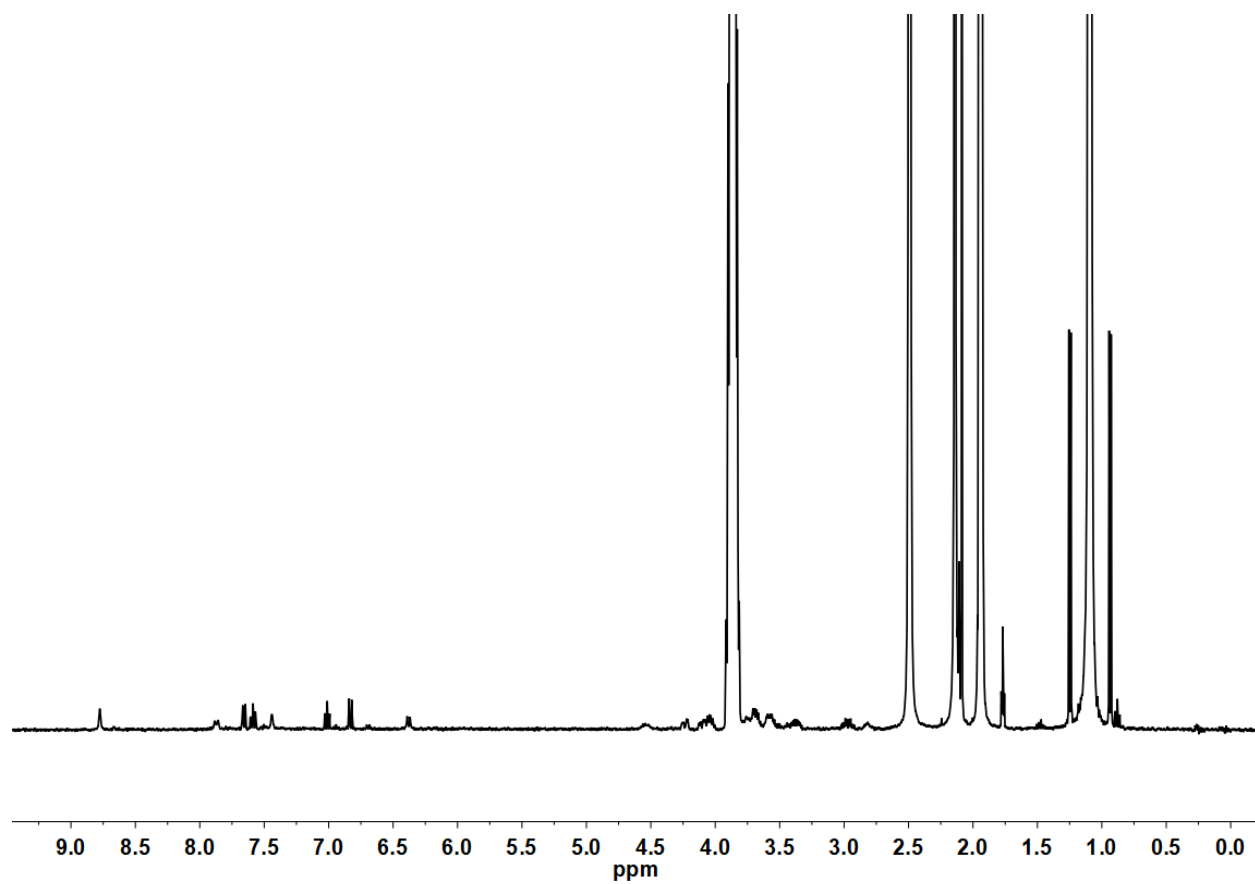

**Figure S8.** The  $^1\text{H}$  NMR spectrum of  $[\text{VO}(\text{Hshed})(4\text{NO}_2)]$  in  $\text{CD}_3\text{CN}$ .

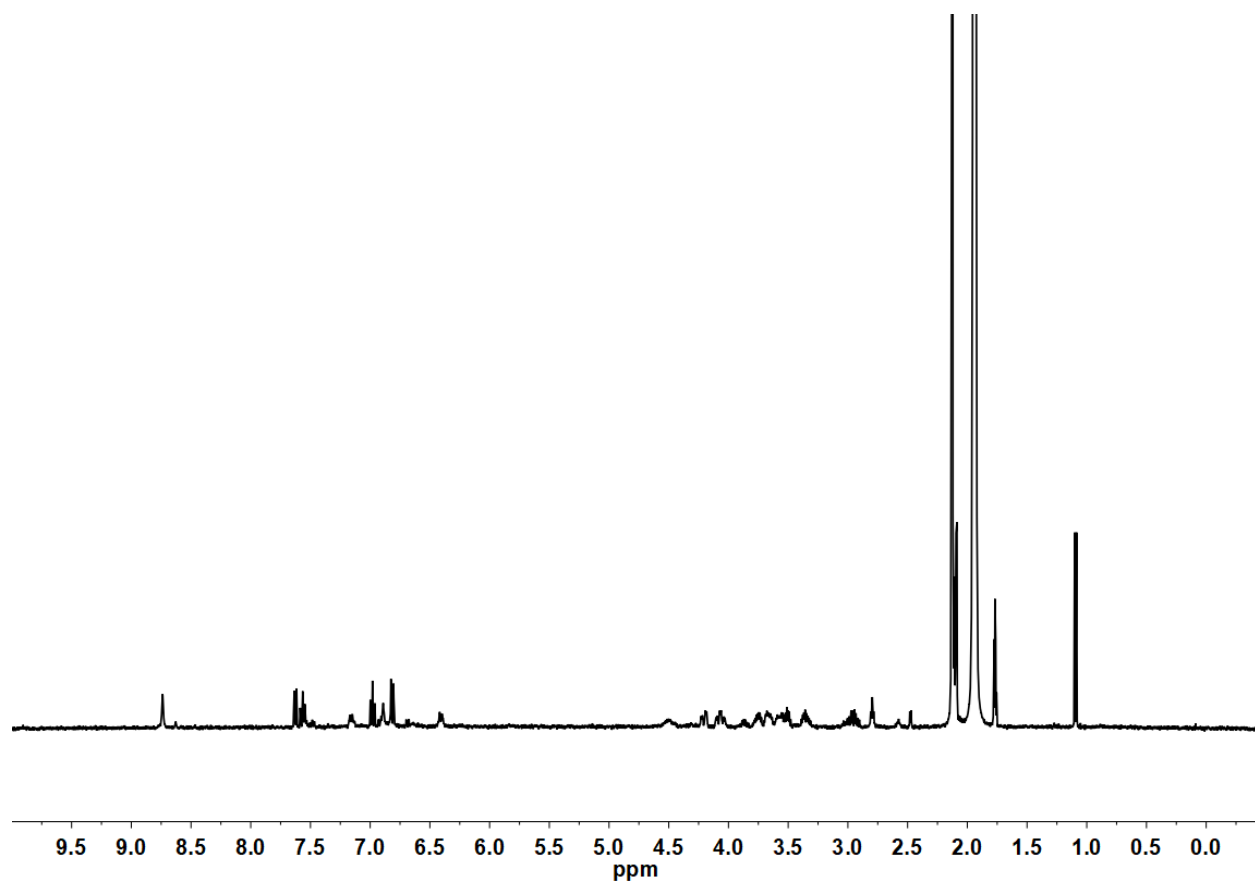

**Figure S9.** The  $^1\text{H}$  NMR spectrum of  $[\text{VO}(\text{Hshed})(\text{CN})]$  in  $\text{CD}_3\text{CN}$ .

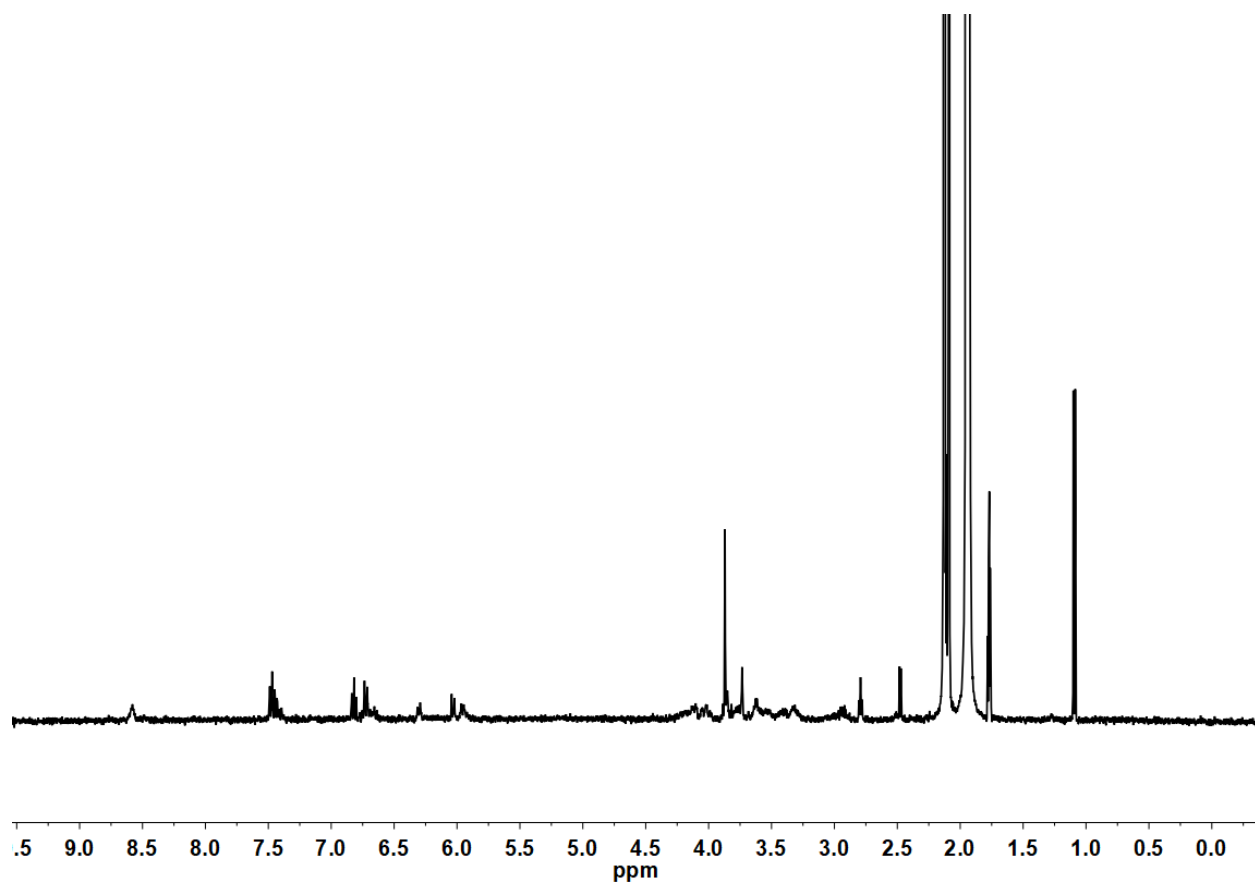

**Figure S10.** The  $^1\text{H}$  NMR spectrum of  $[\text{VO}(\text{Hshed})(3\text{OMet})]$  in  $\text{CD}_3\text{CN}$ .

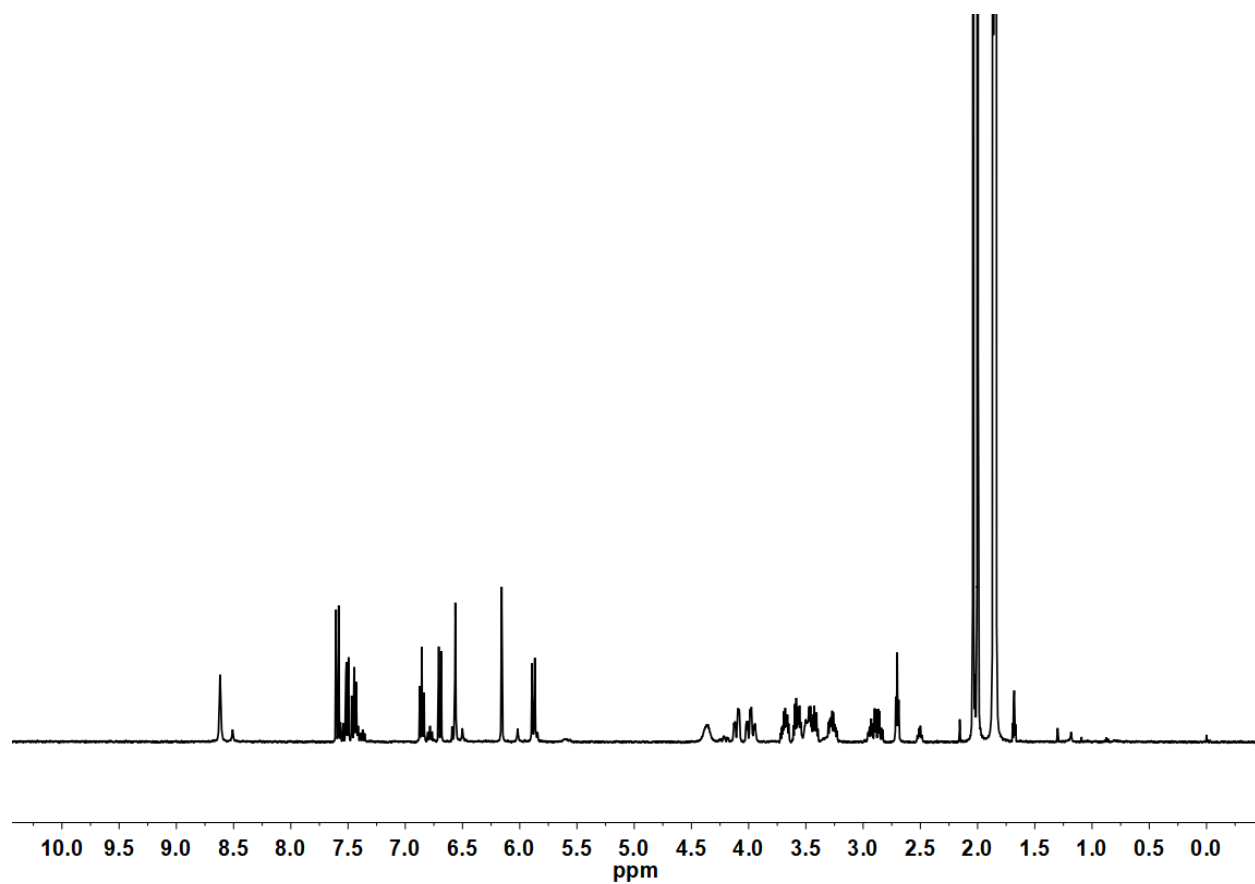

**Figure S11.** The  $^1\text{H}$  NMR spectrum of  $[\text{VO}(\text{Hshed})(\text{Coum})]$  in  $\text{CD}_3\text{CN}$ .

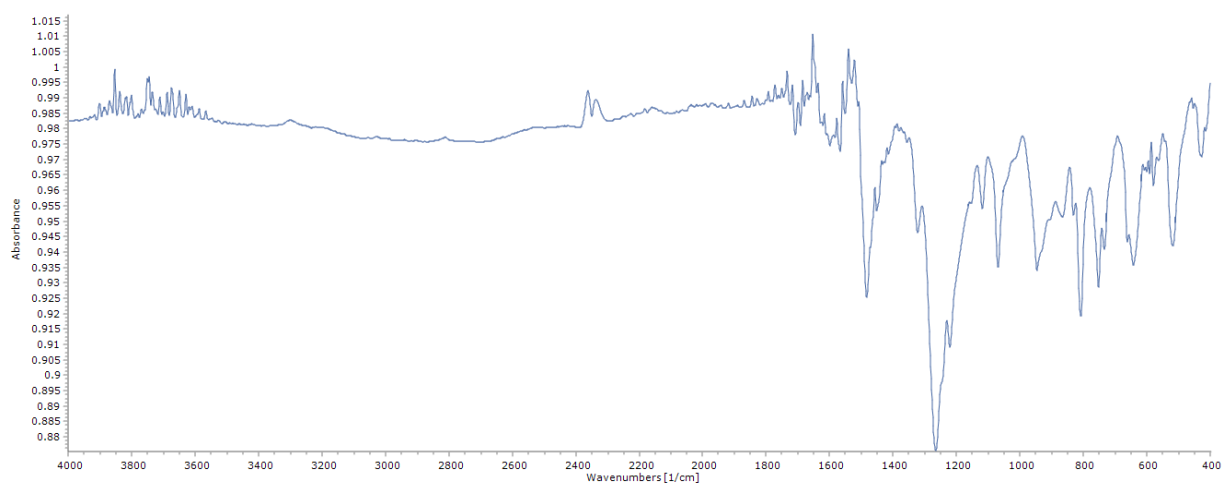

**Figure S12.** The IR spectrum of [VO(Hshed)(4NO<sub>2</sub>)].

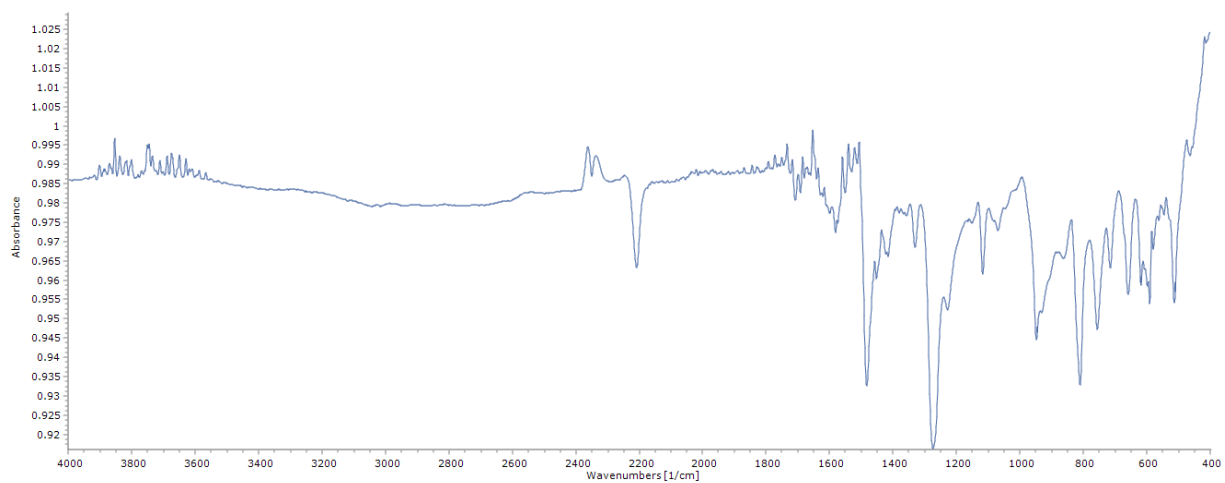

**Figure S13.** The IR spectrum of [VO(Hshed)(CN)].



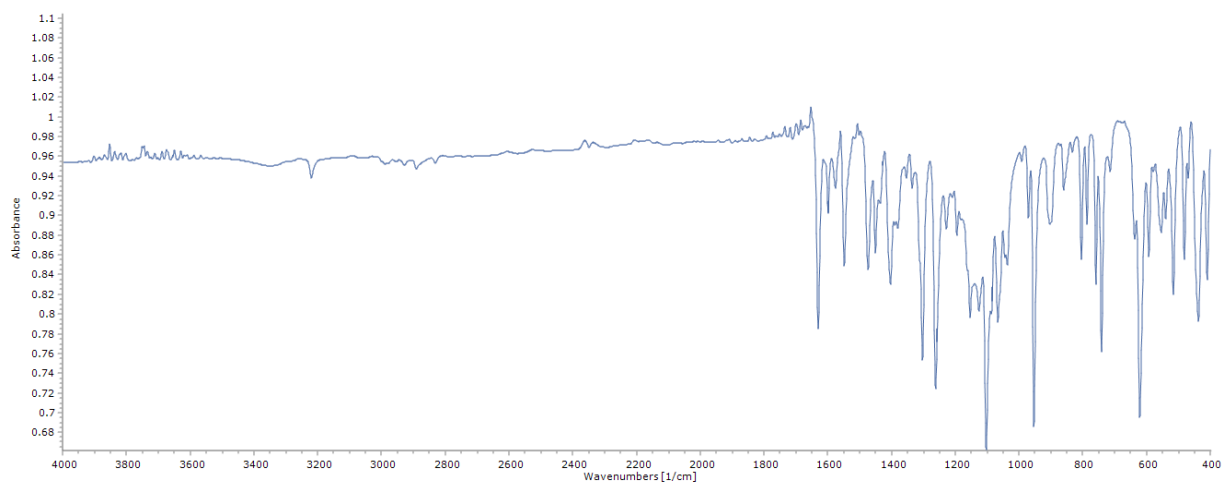

**Figure S14.** The IR spectrum of [VO(Hshed)(3OMet)].

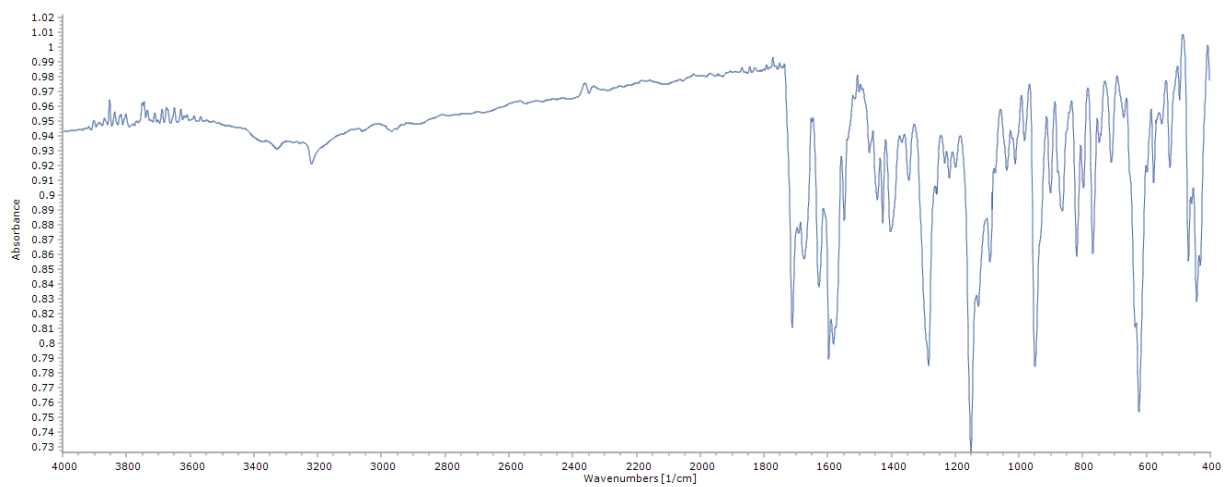

**Figure S15.** The IR spectrum of [VO(Hshed)(Coum)].

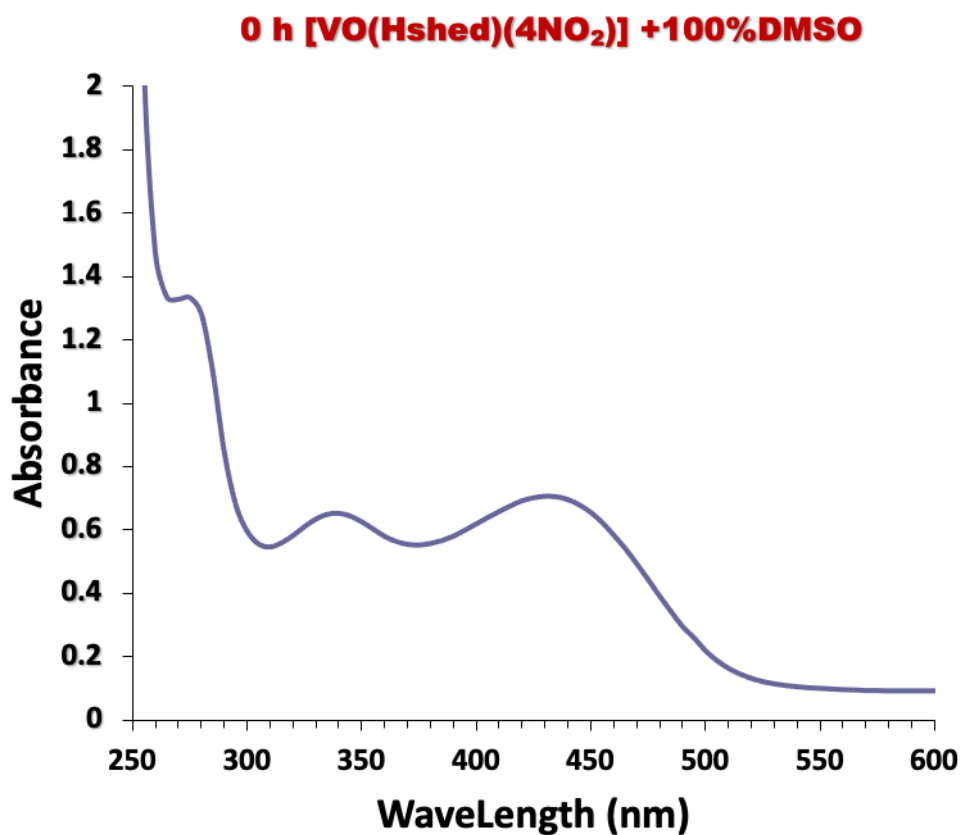

| Complex                                       | [complex]<br>mM | Complex (100%DMSO)<br>absorbance (nm)/ $\epsilon$<br>( $\times 10^3 \text{ M}^{-1}$ ) |
|-----------------------------------------------|-----------------|---------------------------------------------------------------------------------------|
| [VO(Hshed)(4NO <sub>2</sub> )]<br>(100% DMSO) | 0.250           | (280, 1.282, 5.1);                                                                    |
|                                               |                 | (340, 0.653, 2.6);                                                                    |
|                                               |                 | (435, 0.705, 2.8)                                                                     |

**Figure S16.** The UV-vis spectrum of [VO(Hshed)(4NO<sub>2</sub>)].

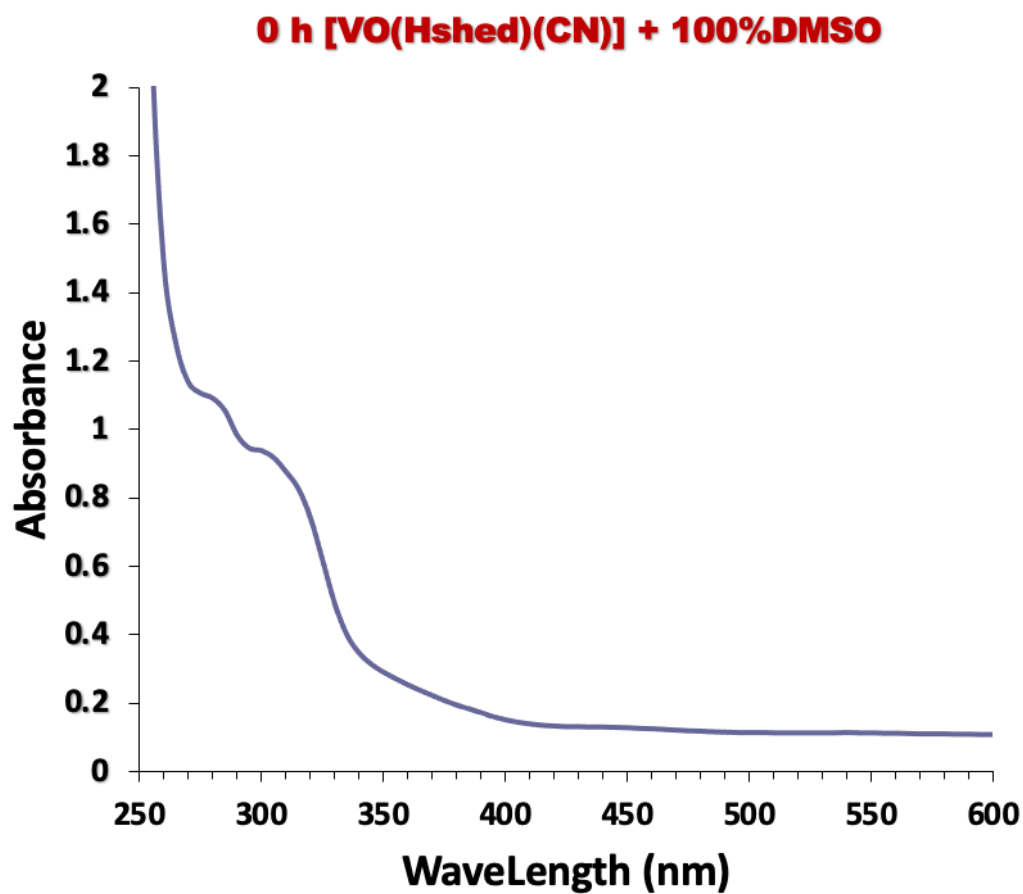

| Complex                          | [complex]<br>mM | Complex (100%DMSO)<br>absorbance (nm)/ $\epsilon$<br>( $\times 10^3 \text{ M}^{-1}$ ) |
|----------------------------------|-----------------|---------------------------------------------------------------------------------------|
| ([VO(Hshed)(CN)]<br>(100% DMSO)) | 0.250           | (280, 1.091, 4.4);                                                                    |
|                                  |                 | (305, 0.917, 3.7)                                                                     |

**Figure S17.** The UV-vis spectrum of [VO(Hshed)(CN)].

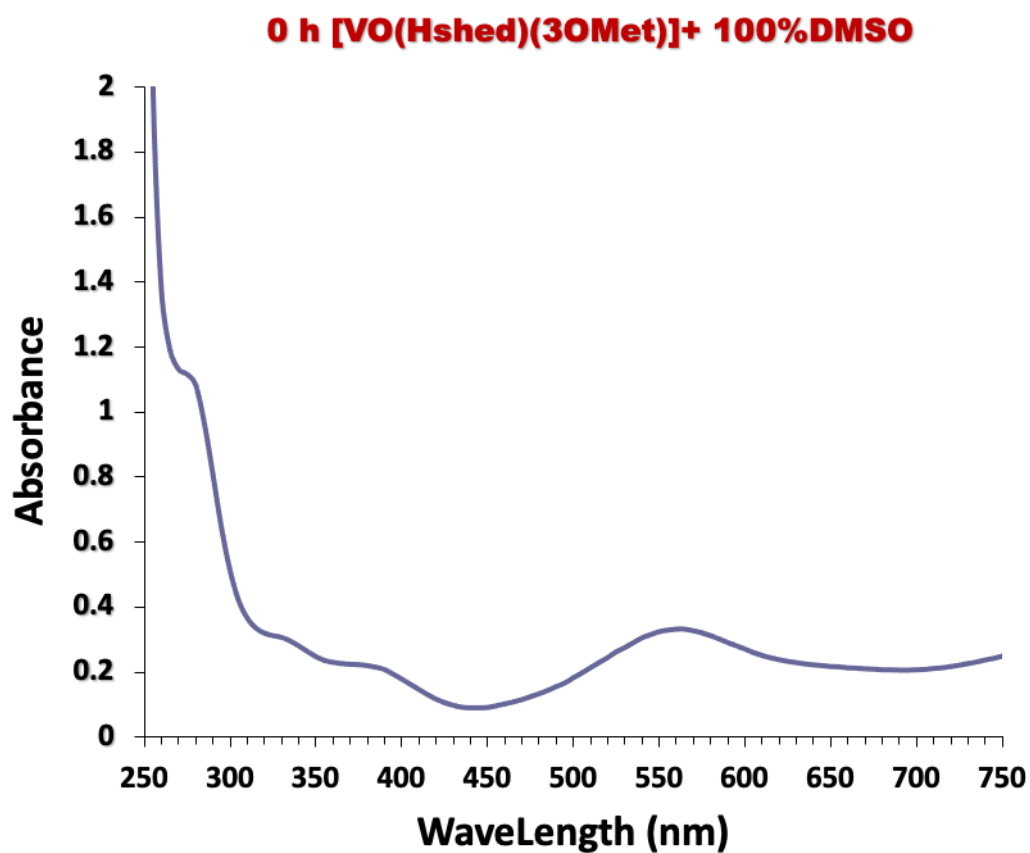

| Complex                              | [complex]<br>mM | Complex (100%DMSO)<br>absorbance (nm)/ $\epsilon$<br>( $\times 10^3 \text{ M}^{-1}$ ) |
|--------------------------------------|-----------------|---------------------------------------------------------------------------------------|
| [VO(Hshed)(3OMet)] /<br>(100%DMSO) / | 0.250           | (280, 1.086, 4.3);                                                                    |
|                                      |                 | (335, 0.298, 1.2);                                                                    |
|                                      |                 | (390, 0.21, 0.84);                                                                    |
|                                      |                 | (565, 0.334, 1.3)                                                                     |

**Figure S18.** The UV-vis spectrum of [VO(Hshed)(3OMet)].

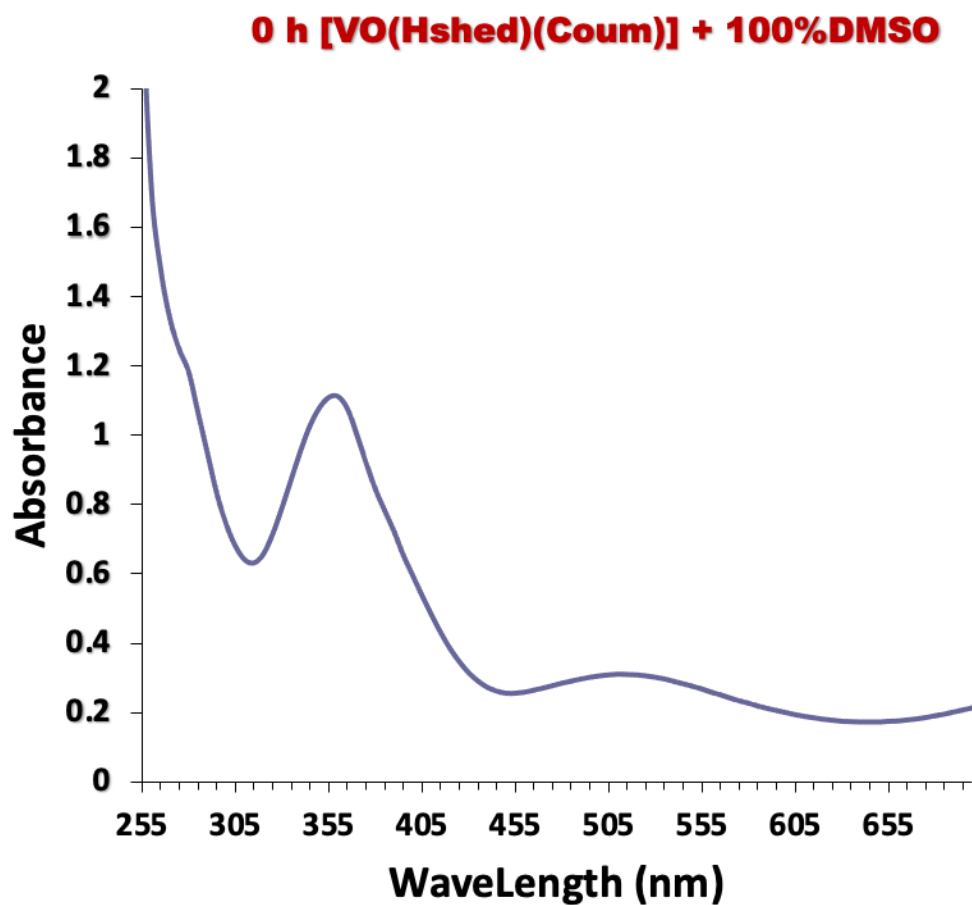

| Complex                          | [complex]<br>mM | Complex (100%DMSO)<br>absorbance (nm)/ $\epsilon$<br>( $\times 10^3 \text{ M}^{-1}$ ) |
|----------------------------------|-----------------|---------------------------------------------------------------------------------------|
| [VO(Hshed)(Coum)]<br>(100% DMSO) | 0.250           | (280, 1.183, 4.7);                                                                    |
|                                  |                 | (360, 1.112, 4.4);                                                                    |
|                                  |                 | (520, 0.309, 1.2)                                                                     |

Figure S19. The UV-vis spectrum of [VO(Hshed)(Coum)].

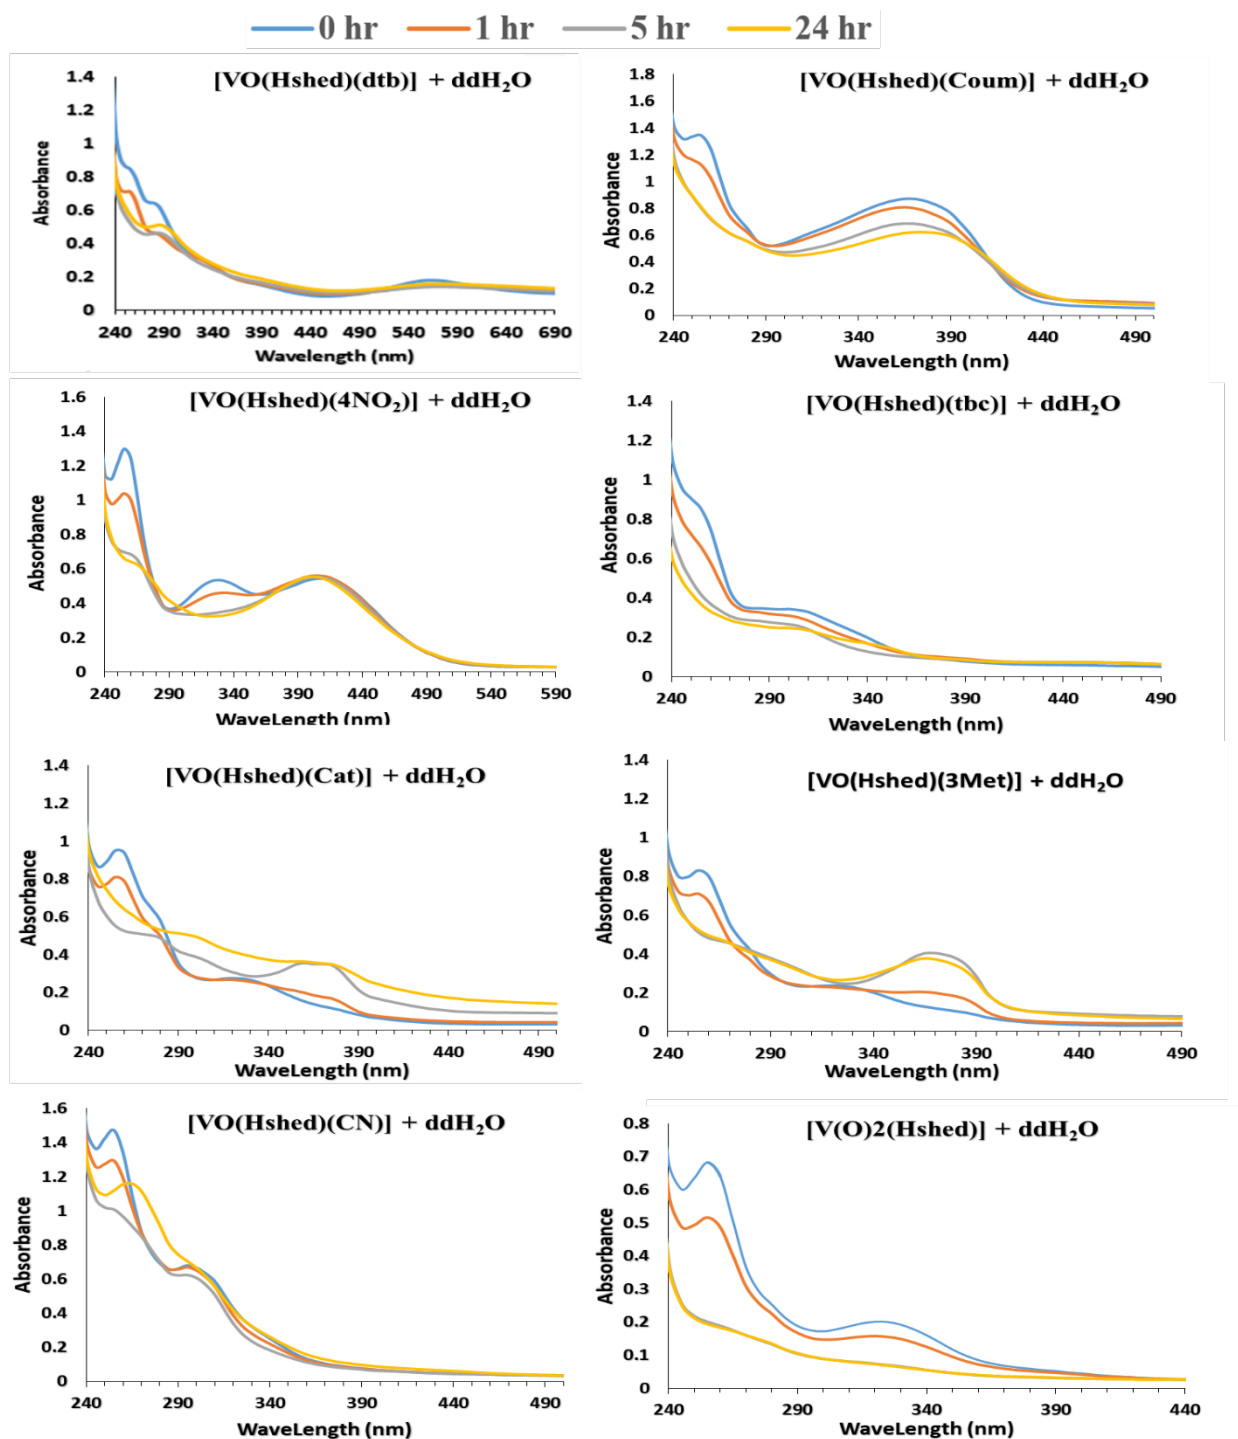

**Figure S20.** The UV-vis spectra are recorded of all the complexes at 0.250 mM in ddH<sub>2</sub>O as a function of time (0, 1, 5, 24 h).

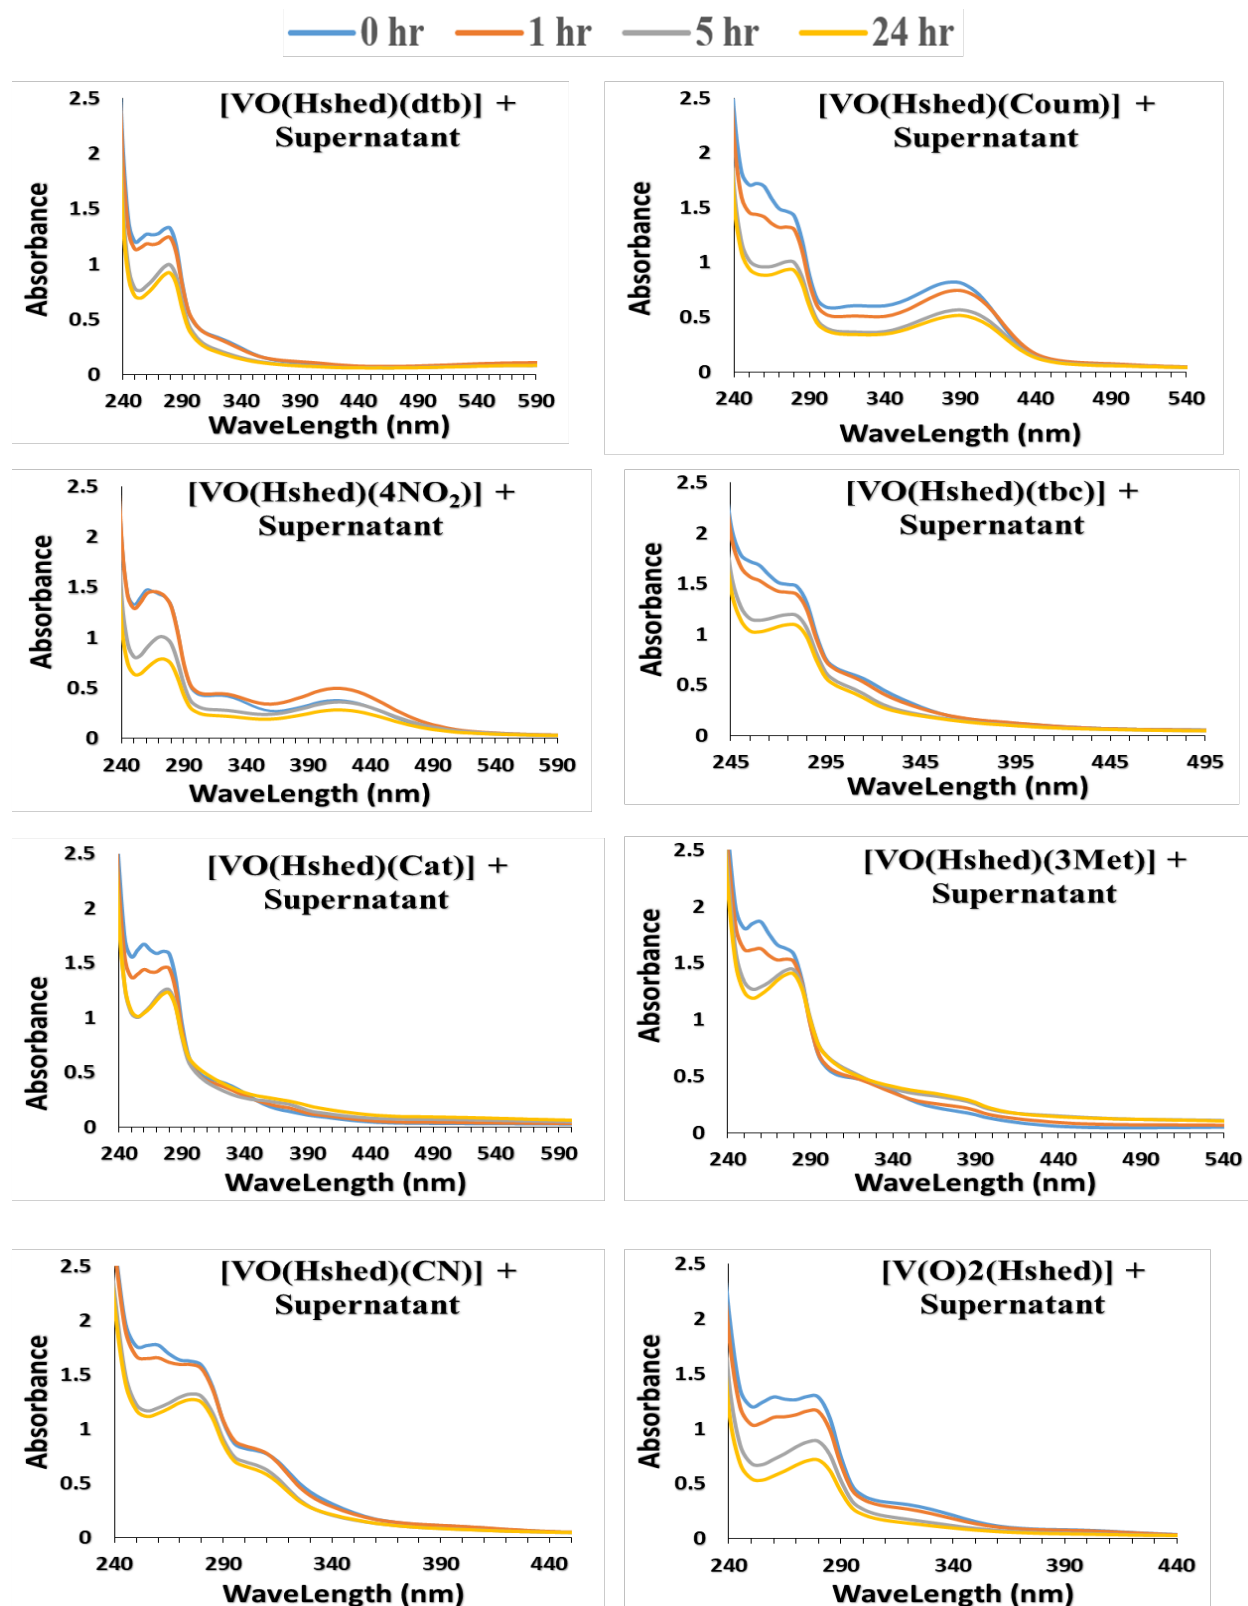

Figure S21. The UV-vis spectra are recorded of all the complexes at 0.250 mM in supernatant fraction as a function of time (0,1, 5, 24 h).



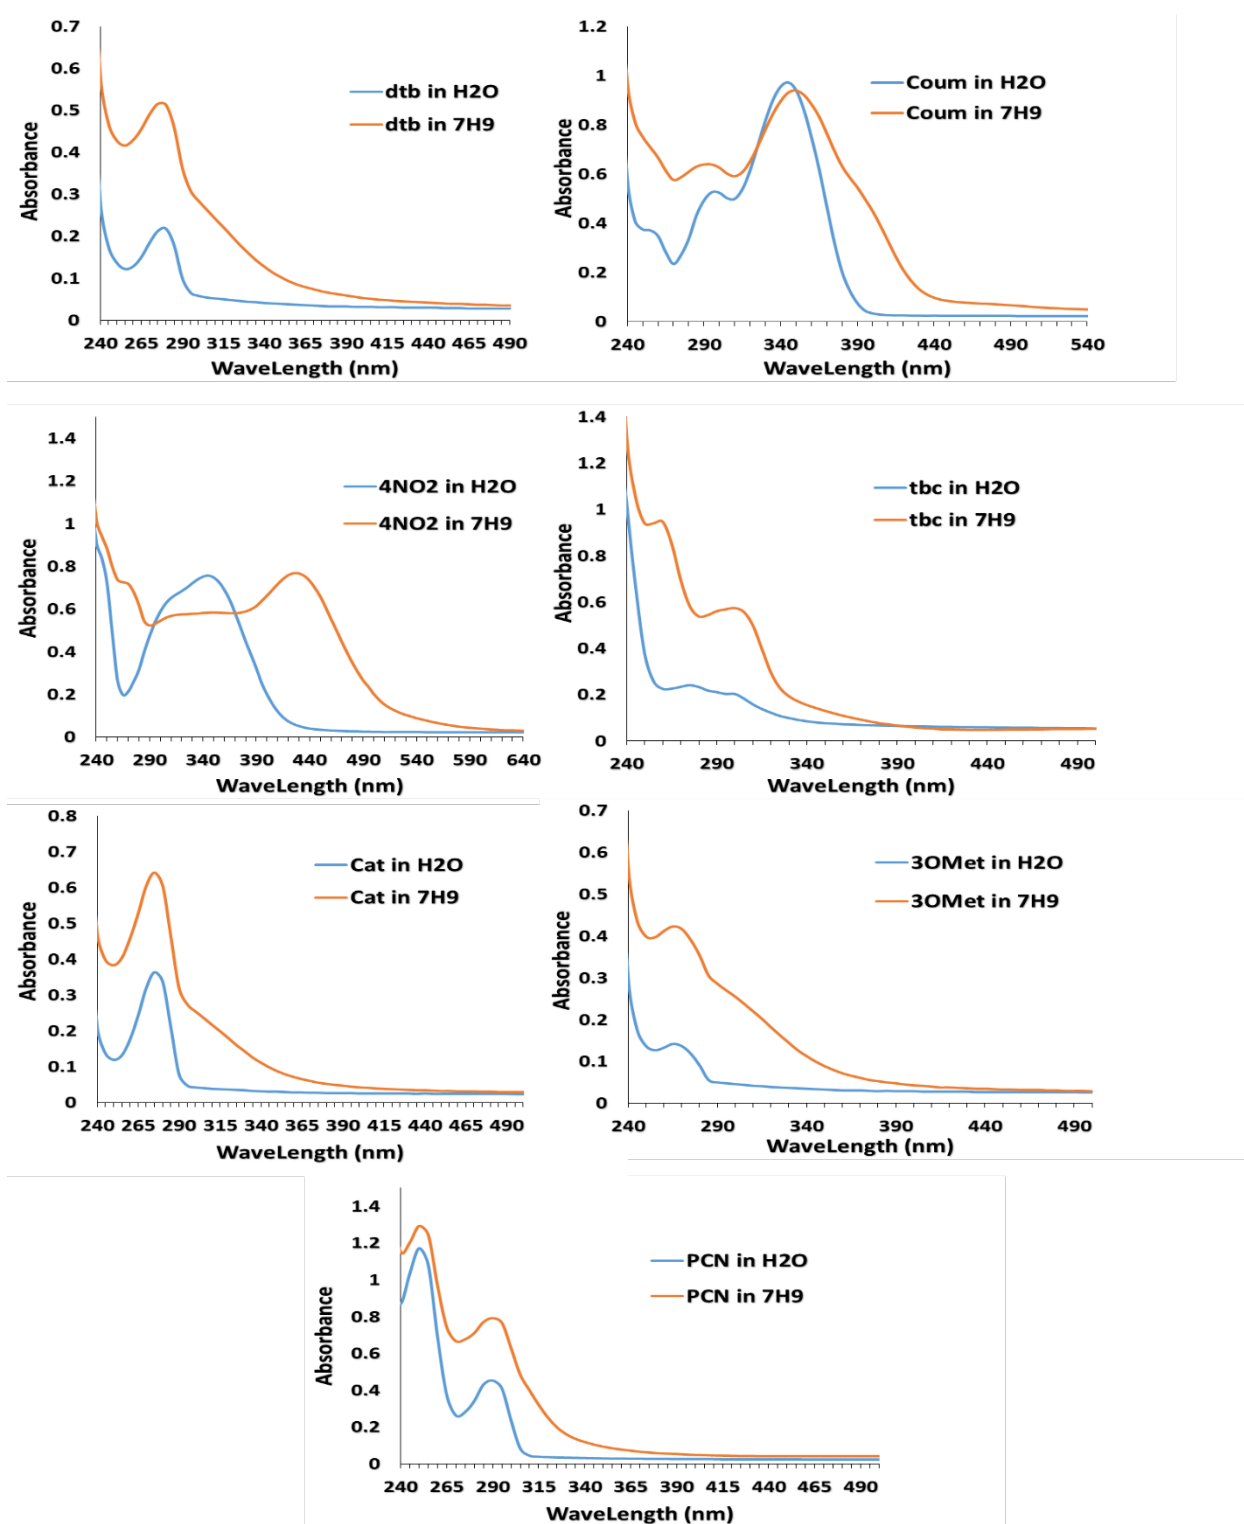

**Figure S22.** The UV-vis spectra are recorded of all the free ligands at 0.250 mM in ddH<sub>2</sub>O and 7H9 medium at time zero (0 h).

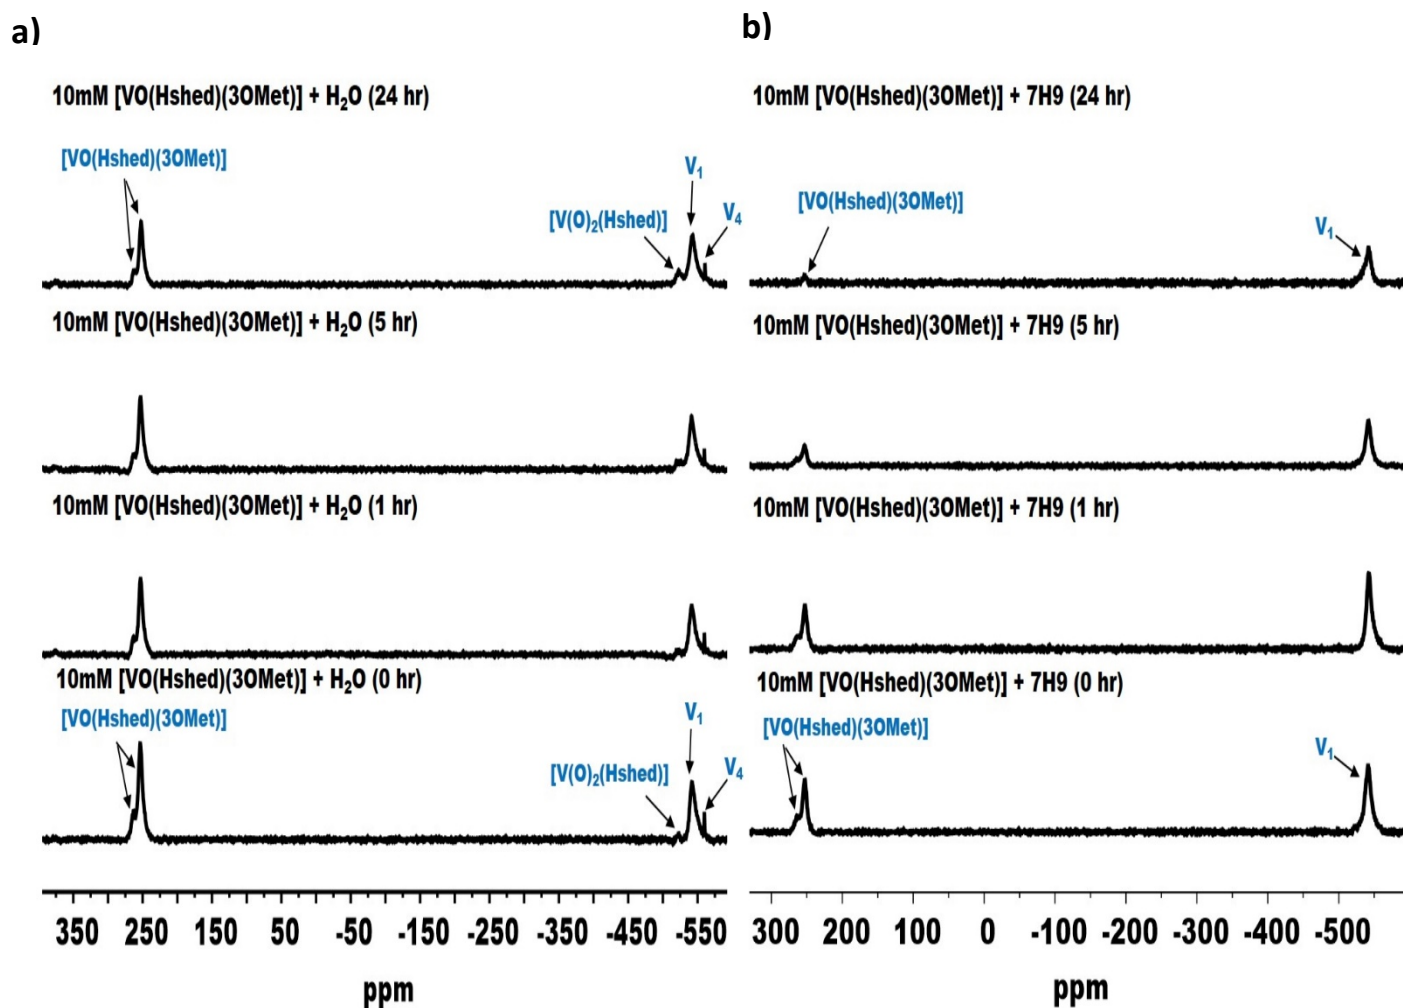

**Figure S23.** The  $^{51}\text{V}$  NMR spectra of 10mM  $[\text{VO}(\text{Hshed})(3\text{OMet})]$  at 0, 1, 5, and 24 h time points in a) 50:50  $\text{H}_2\text{O}$ :DMSO and in b) 50:50 7H9 growth medium: DMSO.

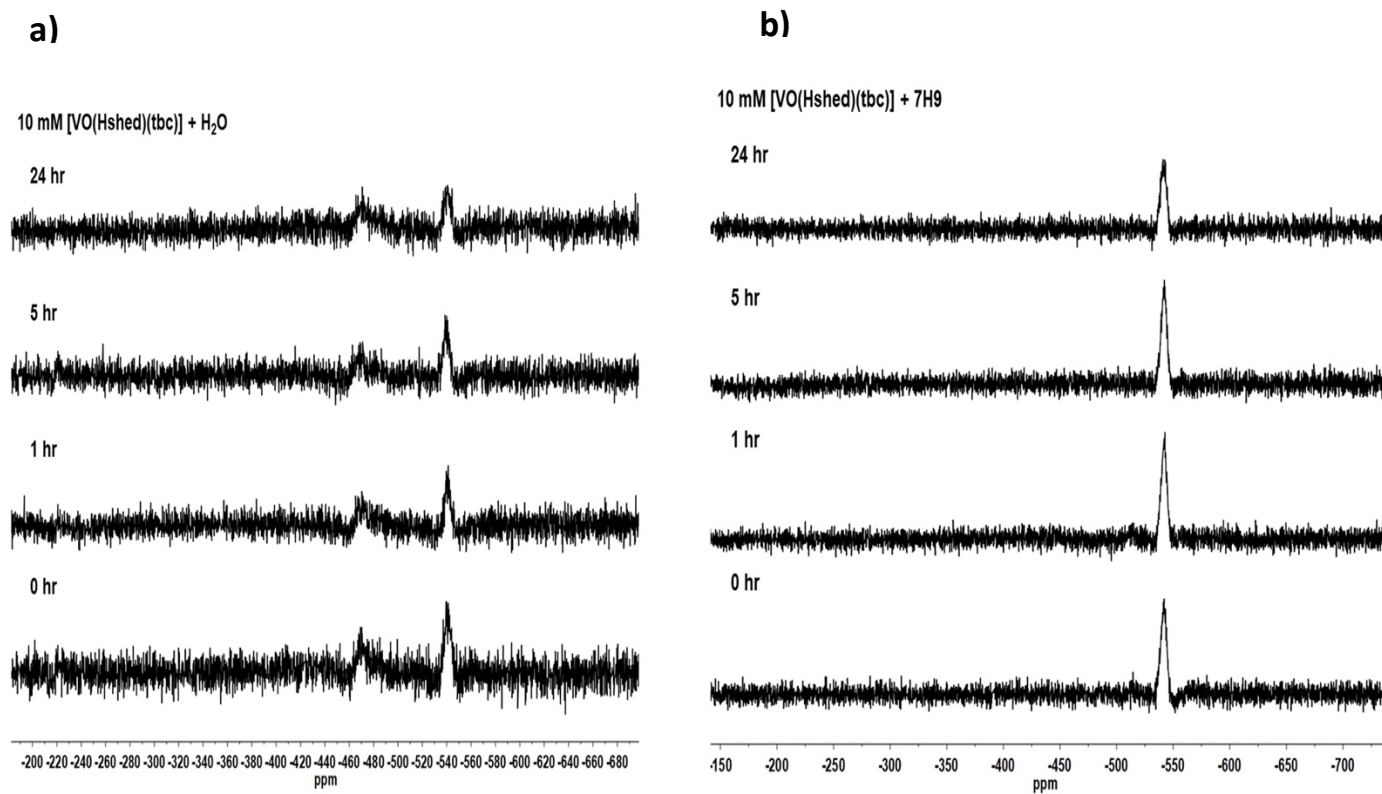

**Figure S24.** The  $^{51}\text{V}$  NMR spectra of 10mM [VO(Hshed)(tbc)] at 0, 1, 5, and 24 h time points in **a)** 50:50 H<sub>2</sub>O:DMSO and in **b)** 50:50 7H9 growth medium: DMSO.

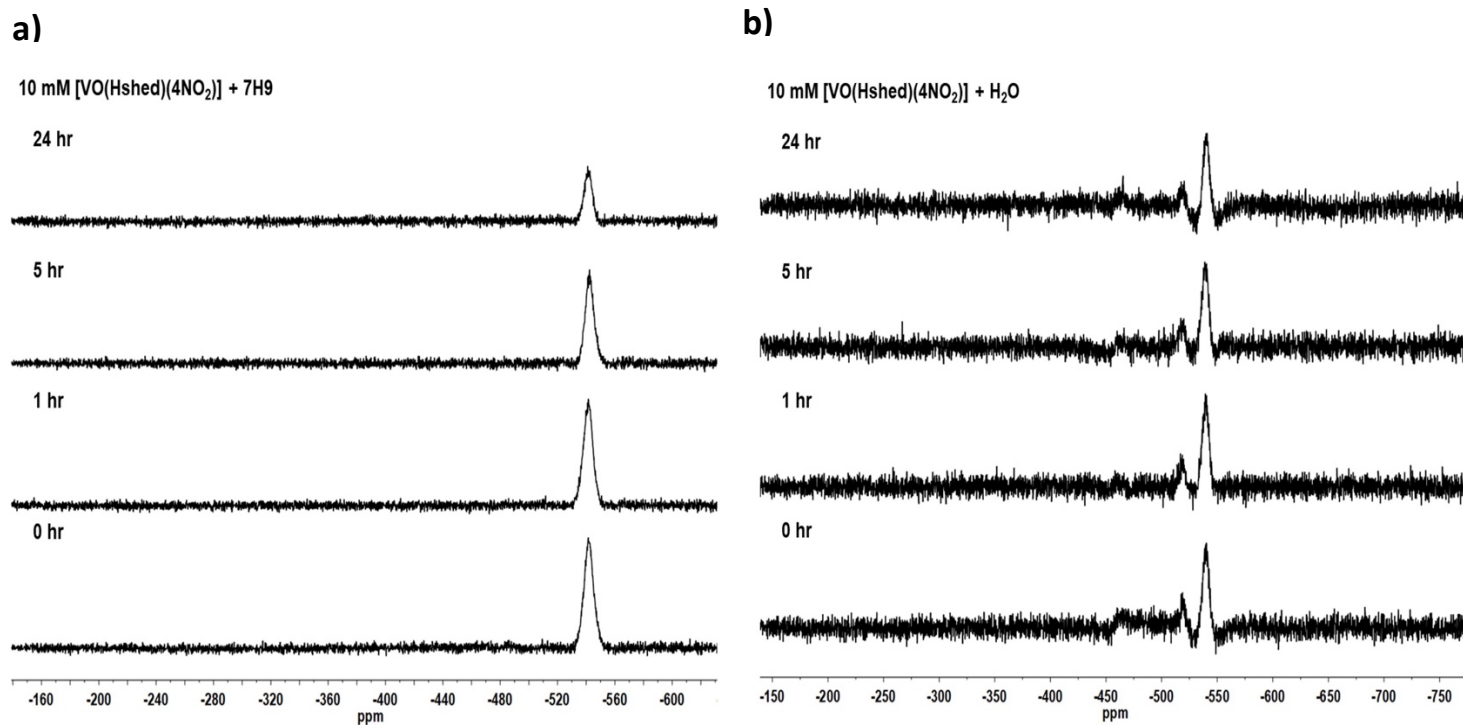

**Figure S25.** The <sup>51</sup>V NMR spectra of 10mM [VO(Hshed)(4NO<sub>2</sub>)] at 0, 1, 5, and 24 h time points in **a)** 50:50 H<sub>2</sub>O:DMSO and in **b)** 50:50 7H9 growth medium: DMSO.

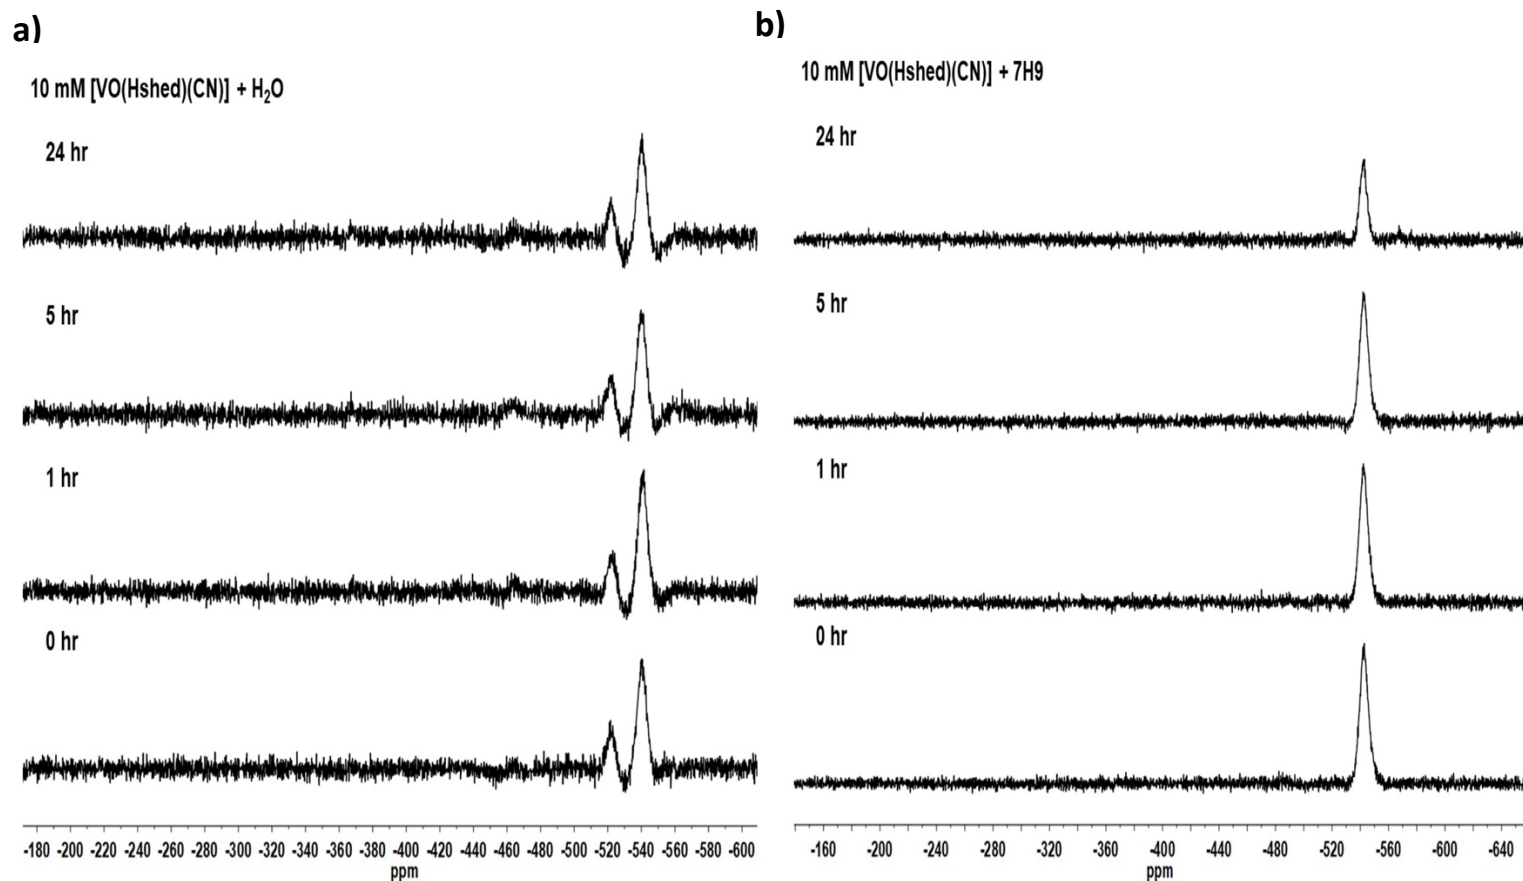

**Figure S26.** The  $^{51}\text{V}$  NMR spectra of 10mM [VO(Hshed)(CN)] at 0, 1, 5, and 24 h time points in **a)** 50:50 H<sub>2</sub>O:DMSO and in **b)** 50:50 7H9 growth medium: DMSO.

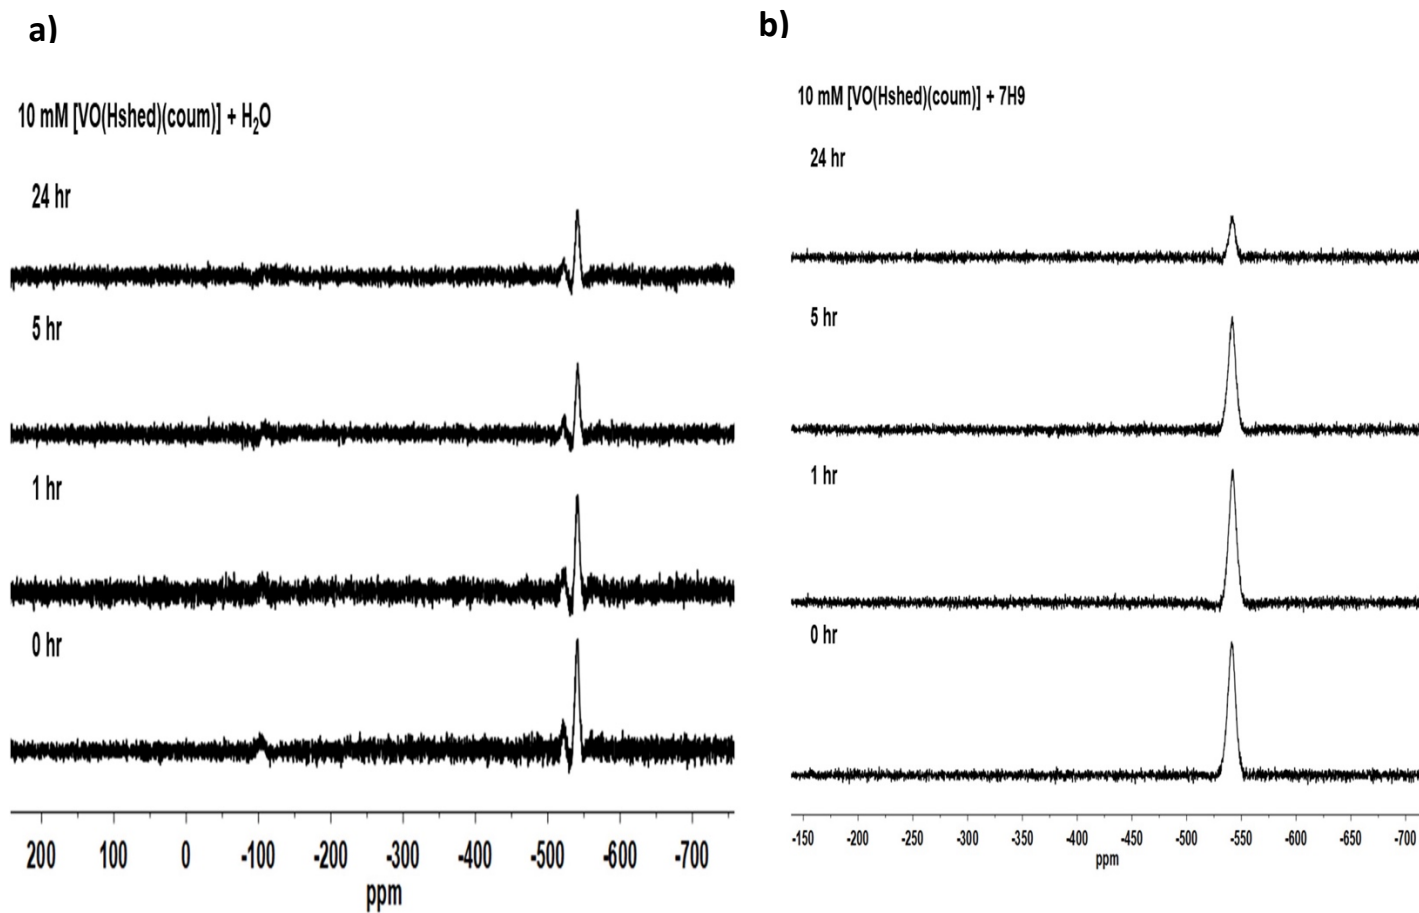

**Figure S27.** The  $^{51}\text{V}$  NMR spectra of 10mM [VO(Hshed)(Coum)] at 0, 1, 5, and 24 h time points in **a)** 50:50 H<sub>2</sub>O:DMSO and in **b)** 50:50 7H9 growth medium: DMSO.

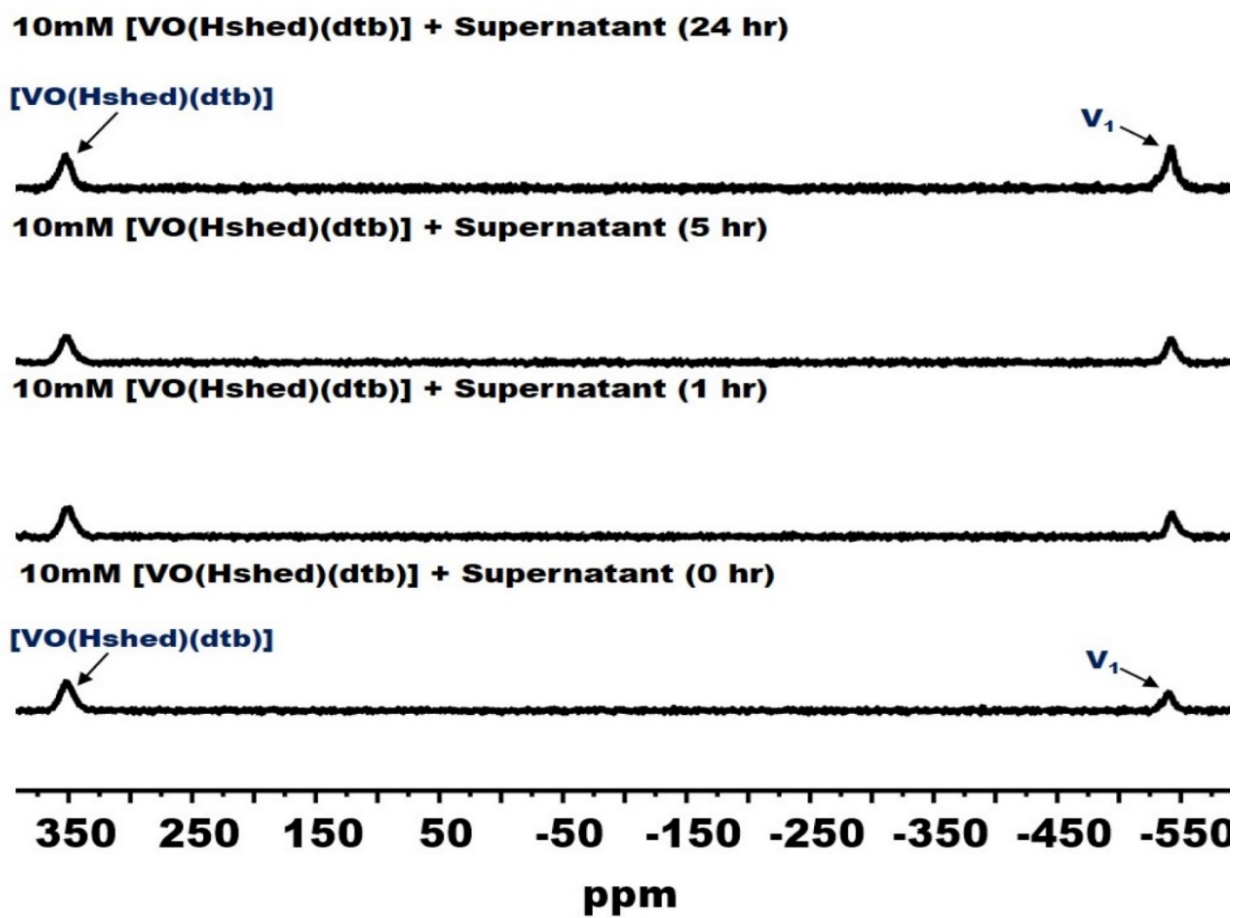

**Figure S28.** The  $^{51}\text{V}$  NMR spectra of 10mM [VO(Hshed)(dtb)] at 0, 1, 5, and 24 h time points in supernatant fraction.

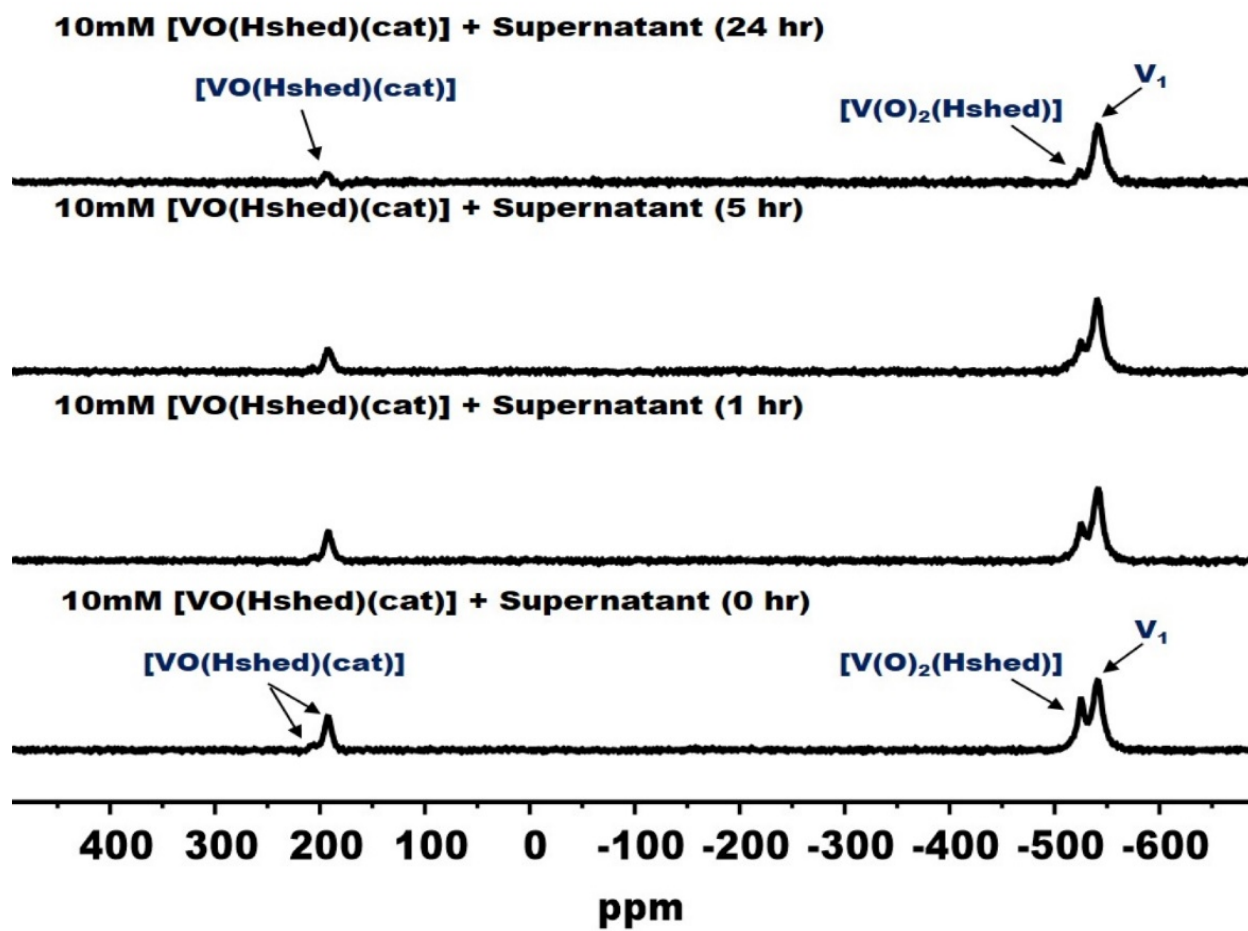

**Figure S29.** The  $^{51}\text{V}$  NMR spectra of 10mM  $[\text{VO}(\text{Hshed})(\text{cat})]$  at 0, 1, 5, and 24 h time points in supernatant fraction.



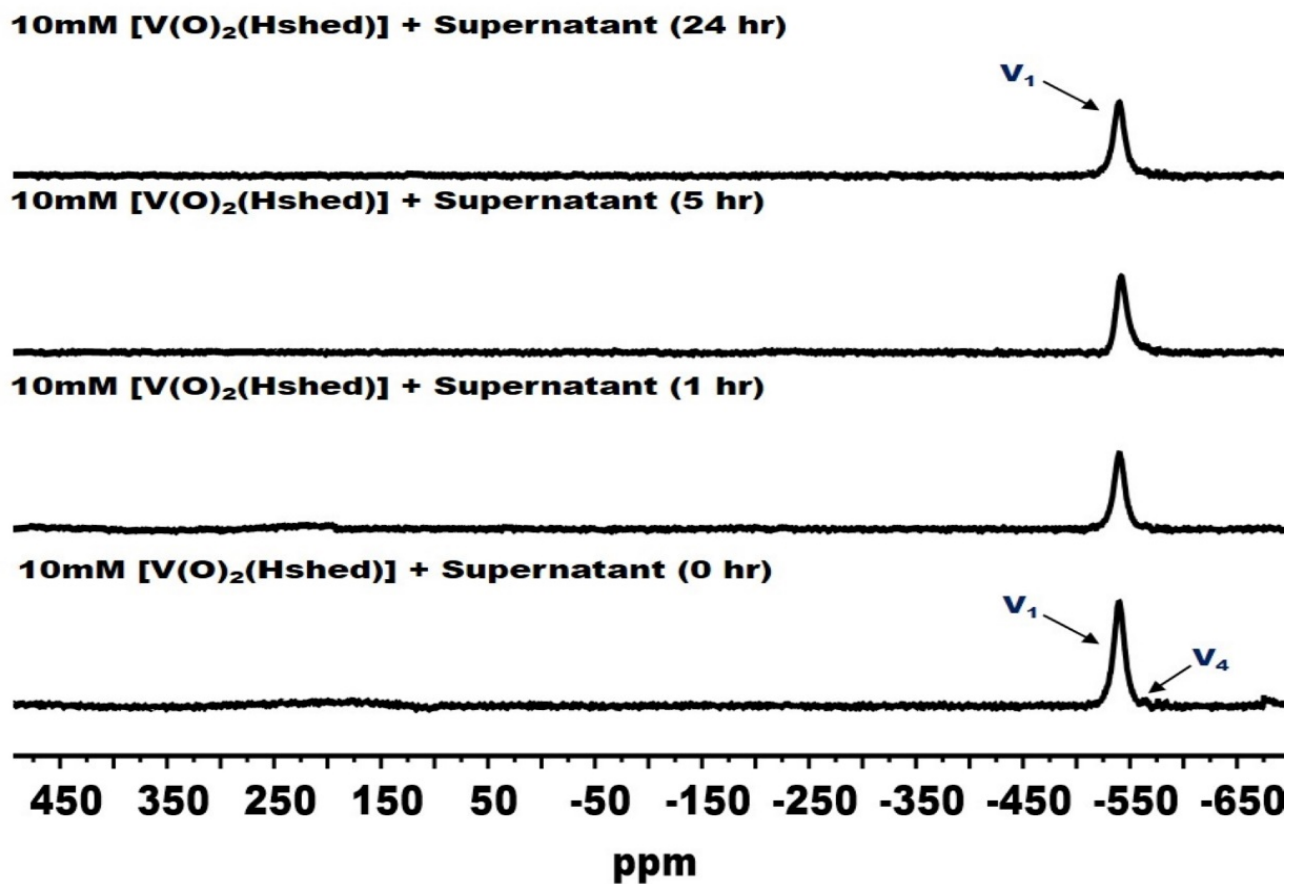

**Figure S30.** The <sup>51</sup>V NMR spectra of 10mM [V(O)<sub>2</sub>(Hshed)] at 0, 1, 5, and 24 h time points in supernatant fraction.

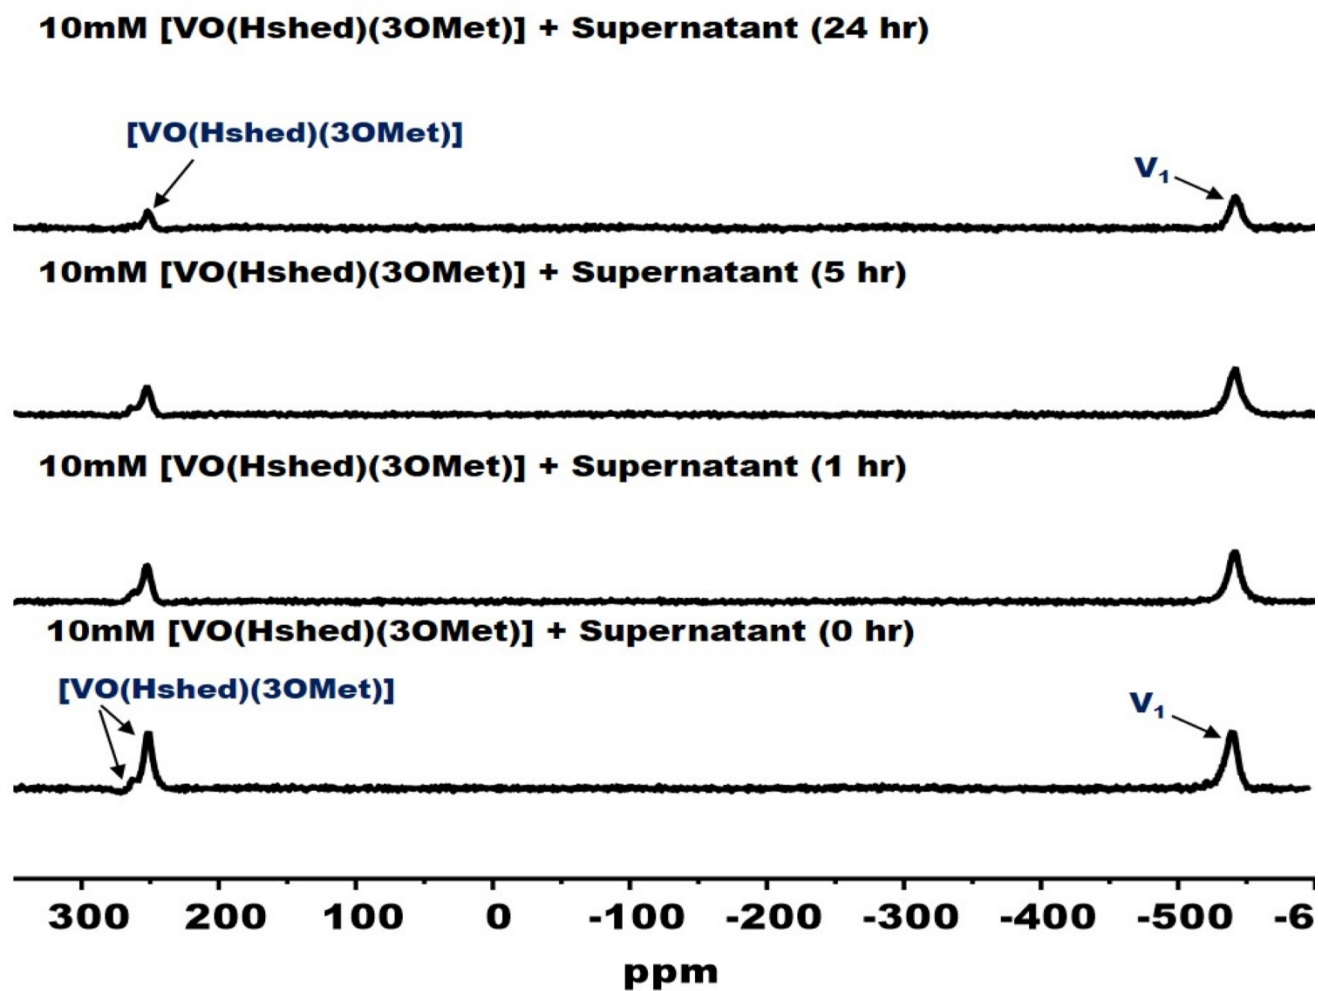

**Figure S31.** The  $^{51}\text{V}$  NMR spectra of 10mM [VO(Hshed)(3OMet)] at 0, 1, 5, and 24 h time points in supernatant fraction.
